# Supplementary material for: A High-Content Screen Reveals New Small-Molecule Enhancers of Ras/Mapk Signaling as Probes for Zebrafish Heart Development
Source: MDPI journal article supplement (doi:10.3390/molecules23071691), 2018-07-11

Supplementary Figure 3. 6994 analogs from the UPCMLD library

**Active at 10 and 20  $\mu$ M**

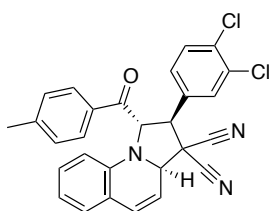

**UPCMLDCBRC1000784**

Chemical Formula:  $C_{28}H_{19}Cl_2N_3O$   
Molecular Weight: 484.38

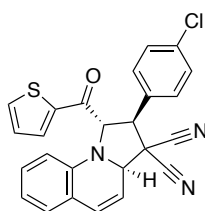

**UPCMLDCBRC1000802**

Chemical Formula:  $C_{25}H_{16}ClN_3OS$   
Molecular Weight: 441.93

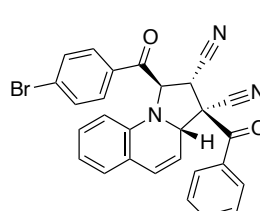

**UPCMLDCBRC1001299**

Chemical Formula:  $C_{28}H_{18}BrN_3O_2$   
Molecular Weight: 508.38

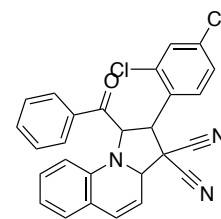

**UPCMLDCBRC1033229**

Chemical Formula:  $C_{27}H_{17}Cl_2N_3O$   
Molecular Weight: 470.35

**Inactive at 10 and 20  $\mu$ M**

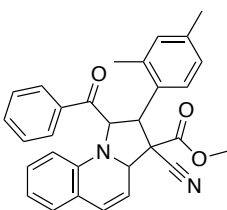

**UPCMLDCBRC1002602**

Chemical Formula:  $C_{30}H_{26}N_2O_3$   
Molecular Weight: 462.55

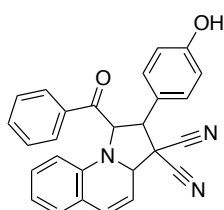

**UPCMLDCBRC1004885**

Chemical Formula:  $C_{27}H_{19}N_3O_2$   
Molecular Weight: 417.47

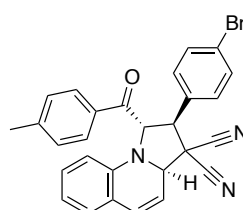

**UPCMLDCBRC1038747**

Chemical Formula:  $C_{28}H_{20}BrN_3O$   
Molecular Weight: 494.39

**Autofluorescent**

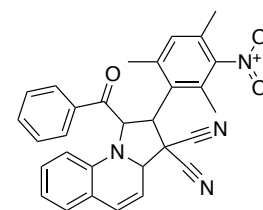

**UPCMLDCBRC1033038**

Chemical Formula:  $C_{30}H_{24}N_4O_3$   
Molecular Weight: 488.55

**HPLC and HRMS Data:**

HPLC data were obtained on a Thermo Scientific Accela HPLC system using 3  $\mu$ L injections on a 2.1 x 50 mm 3.5  $\mu$ m Waters XTerra  $C_{18}$  column eluting with MeCN/ $H_2O$ /MeOH containing 0.1% formic acid (flow rate of 500  $\mu$ L/min from 3:92:5 at 0-0.5 min to 93:2:5 at 4.0 min, back to 3:92:5 from 6.0 to 7.5 min). Absorbance was monitored at 210, 220, and 254 nm. HRMS data were obtained on a Thermo Scientific Exactive HRMS (ESI-). Samples were dissolved in MeCN and 5  $\mu$ L aliquots were direct-injected into the probe head (-60 V, 350  $^{\circ}$ C). Mass accuracy was determined with Thermo Xcalibur software.

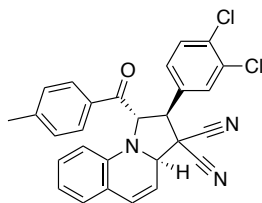

**UPCMLDCBRC1000784.** HPLC retention time 6.43 min. HRMS (HESI)  $m/z$  calcd for  $C_{28}H_{18}N_3O_2Cl_2$   $[M-H]^-$  482.0821, found 482.0841.

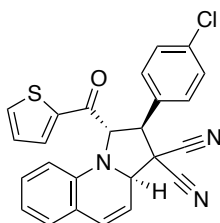

**UPCMLDCBRC1000802.** HPLC retention time 5.16 min. HRMS (HESI)  $m/z$  calcd for  $C_{25}H_{15}N_3OClS$   $[M-H]^-$  440.0619, found 440.0637.

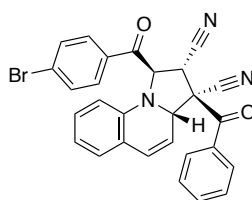

**UPCMLDCBRC1001299.** HPLC retention time 5.89 min. HRMS (HESI)  $m/z$  calcd for  $C_{28}H_{17}N_3O_2Br$   $[M-H]^-$  506.0499, found 506.0526.

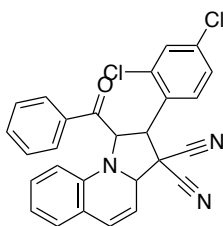

**UPCMLDCBRC1033229.** HPLC retention time 5.46 min. HRMS (HESI)  $m/z$  calcd for  $C_{27}H_{16}N_3OCl_2$   $[M-H]^-$  468.0665, found 468.0684.

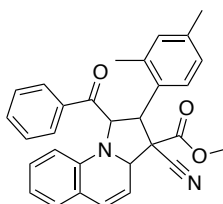

**UPCMLDCBRC1002602.** HPLC retention time 5.81 min. HRMS (HESI)  $m/z$  calcd for  $C_{30}H_{25}N_2O_3$   $[M-H]^-$  461.1860, found 461.1872.

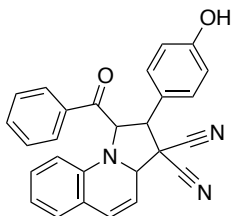

**UPCMLDCBRC1004885.** HPLC retention time 4.90 min. HRMS (HESI)  $m/z$  calcd for  $C_{27}H_{18}N_3O_2$   $[M-H]^-$  416.1394, found 416.1408.

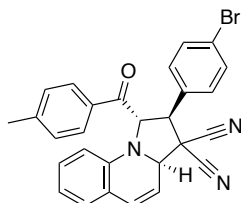

**UPCMLDCBRC1038747.** HPLC retention time 5.45 min. HRMS (HESI)  $m/z$  calcd for  $C_{28}H_{19}N_3OBr$   $[M-H]^-$  492.0706, found 492.0724.

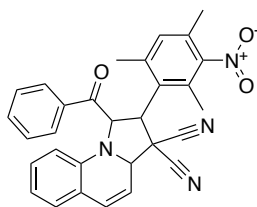

**UPCMLDCBRC1033038.** HPLC retention time 5.30 min. HRMS (HESI)  $m/z$  calcd for  $C_{30}H_{23}N_4O_3$   $[M-H]^-$  487.1765, found 487.1778.

RT: 0.00 - 9.98

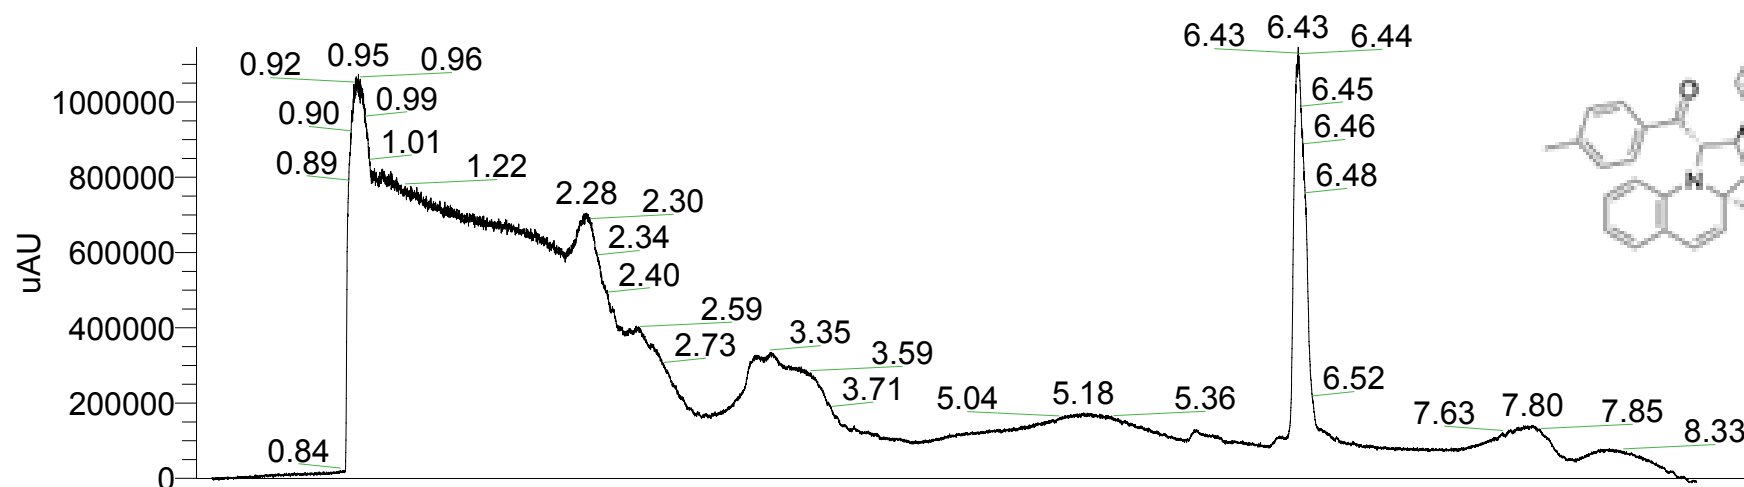

NL:  
1.15E6  
Channel A  
UV  
C1000784\_  
1

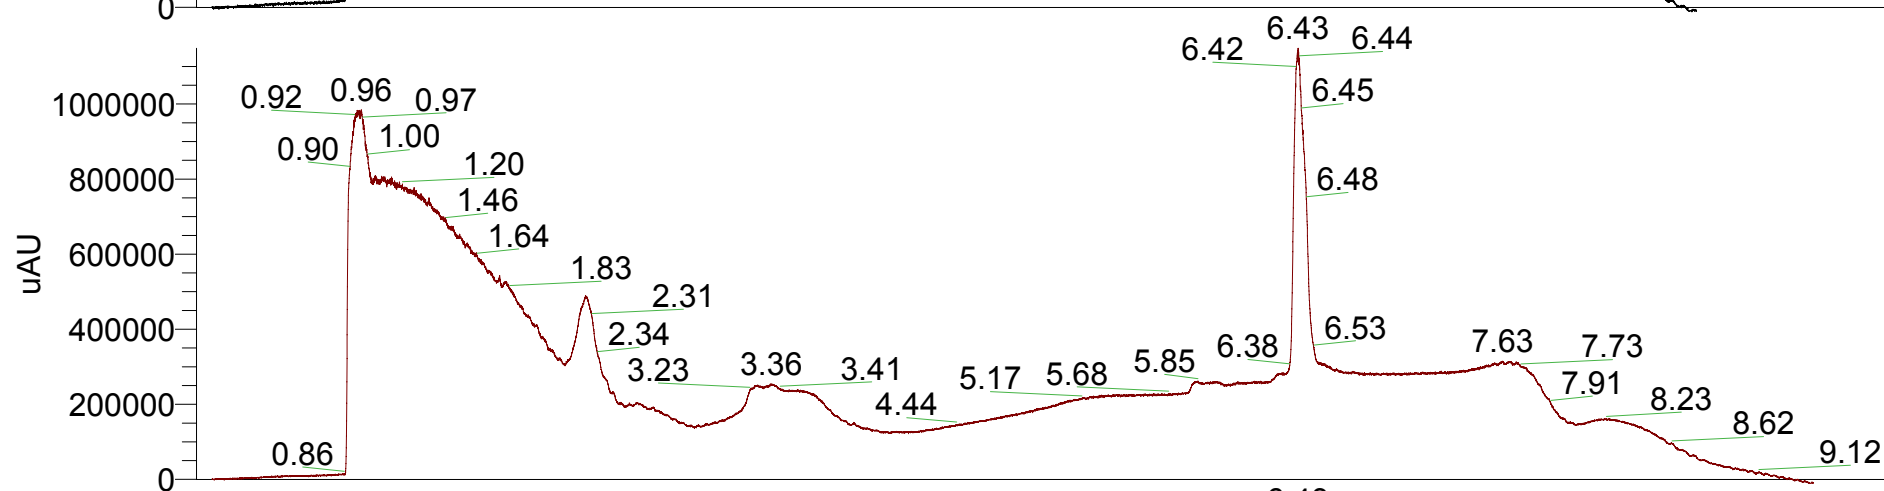

NL:  
1.15E6  
Channel B  
UV  
C1000784\_  
1

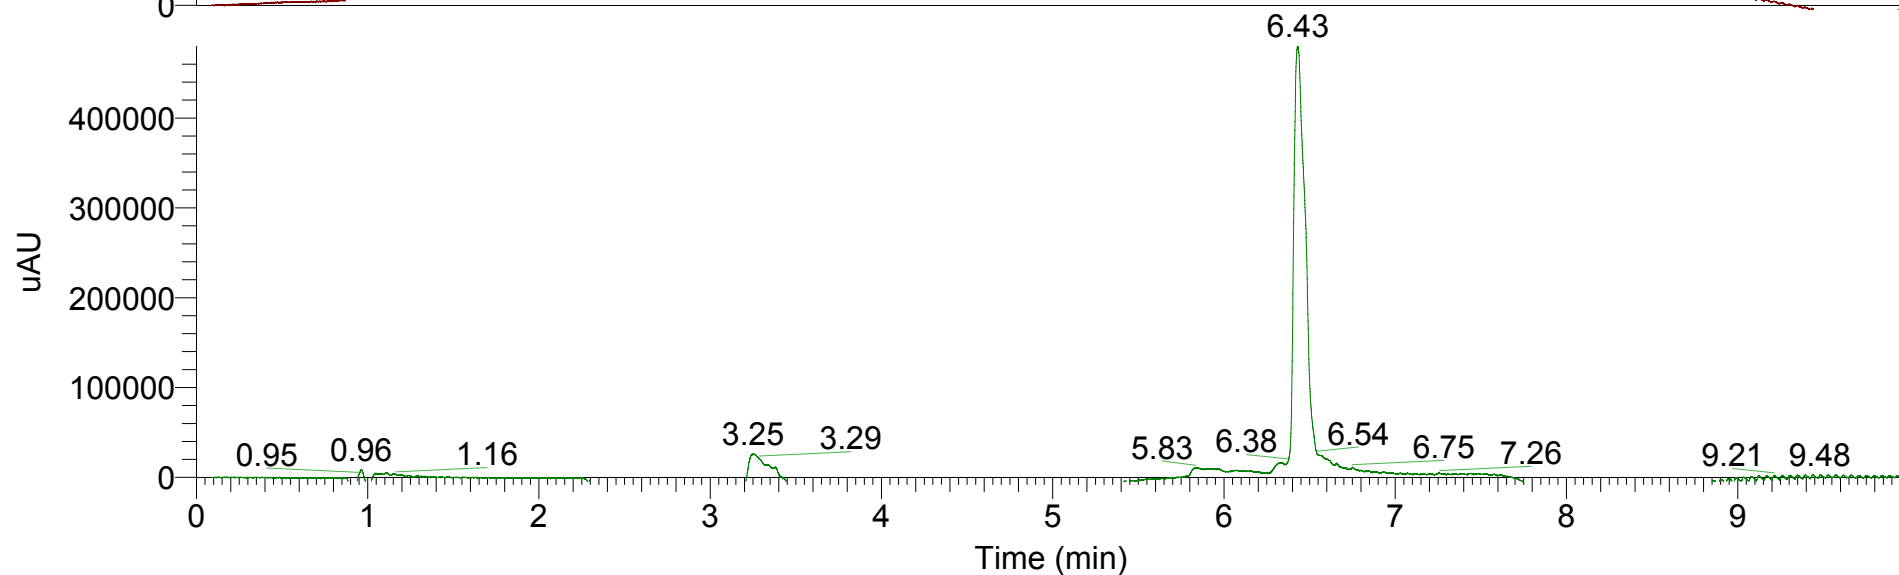

NL:  
4.80E5  
Channel C  
UV  
C1000784\_  
1

RT: 0.00 - 0.73

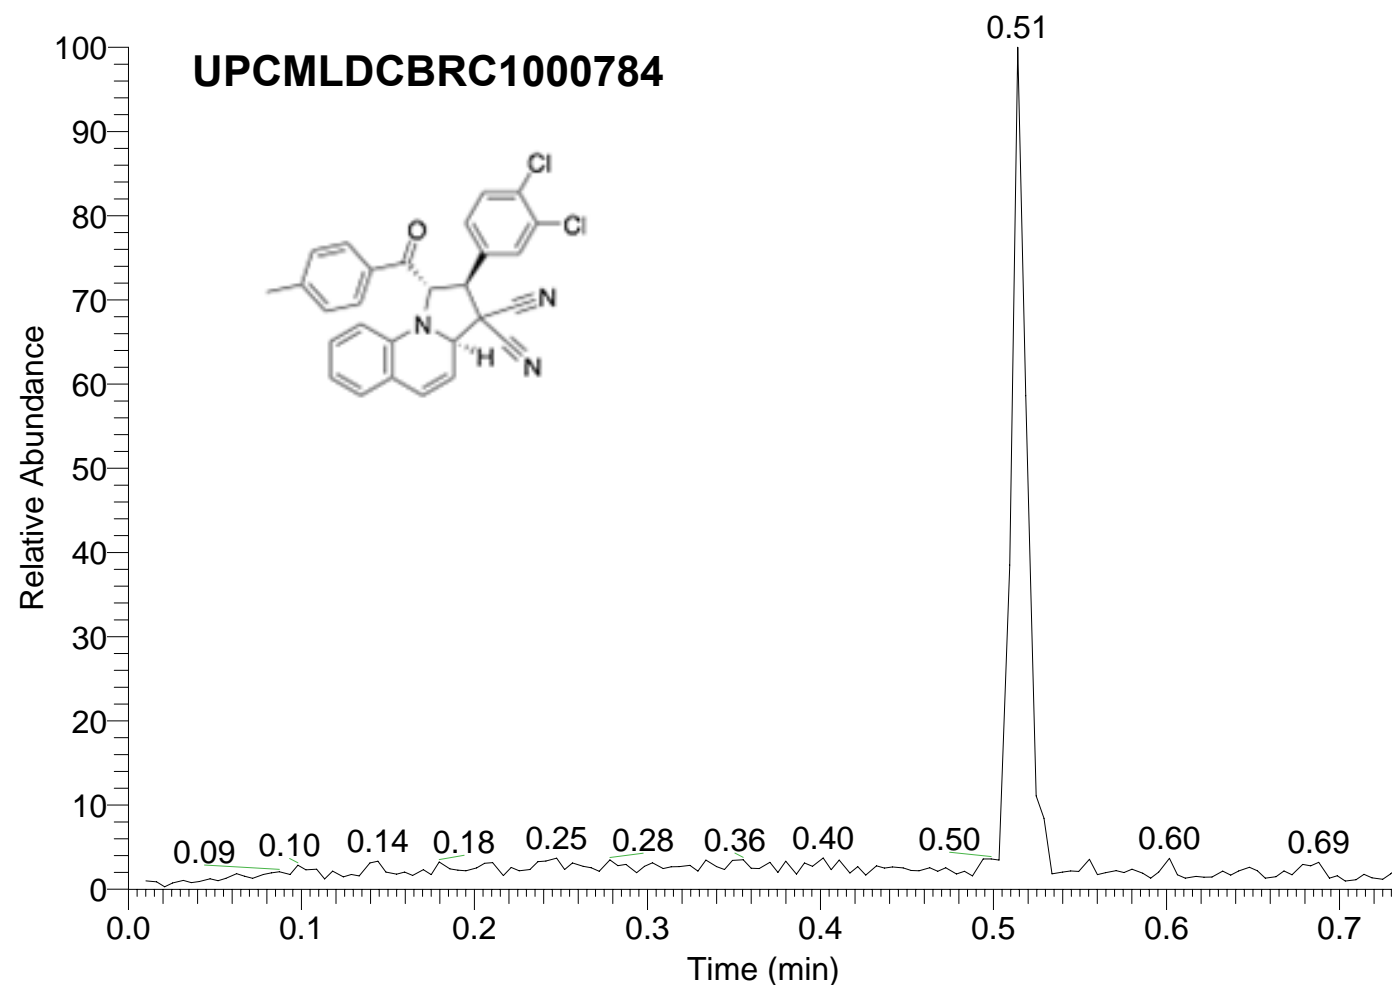

NL:  
8.73E7  
TIC F: FTMS -  
p ESI Full ms  
[150.00-  
2000.00] MS  
C1000784\_DI

C1000784\_DI #98-101 RT: 0.51-0.52 AV: 4 NL: 6.70E5  
T: FTMS - p ESI Full ms [150.00-2000.00]

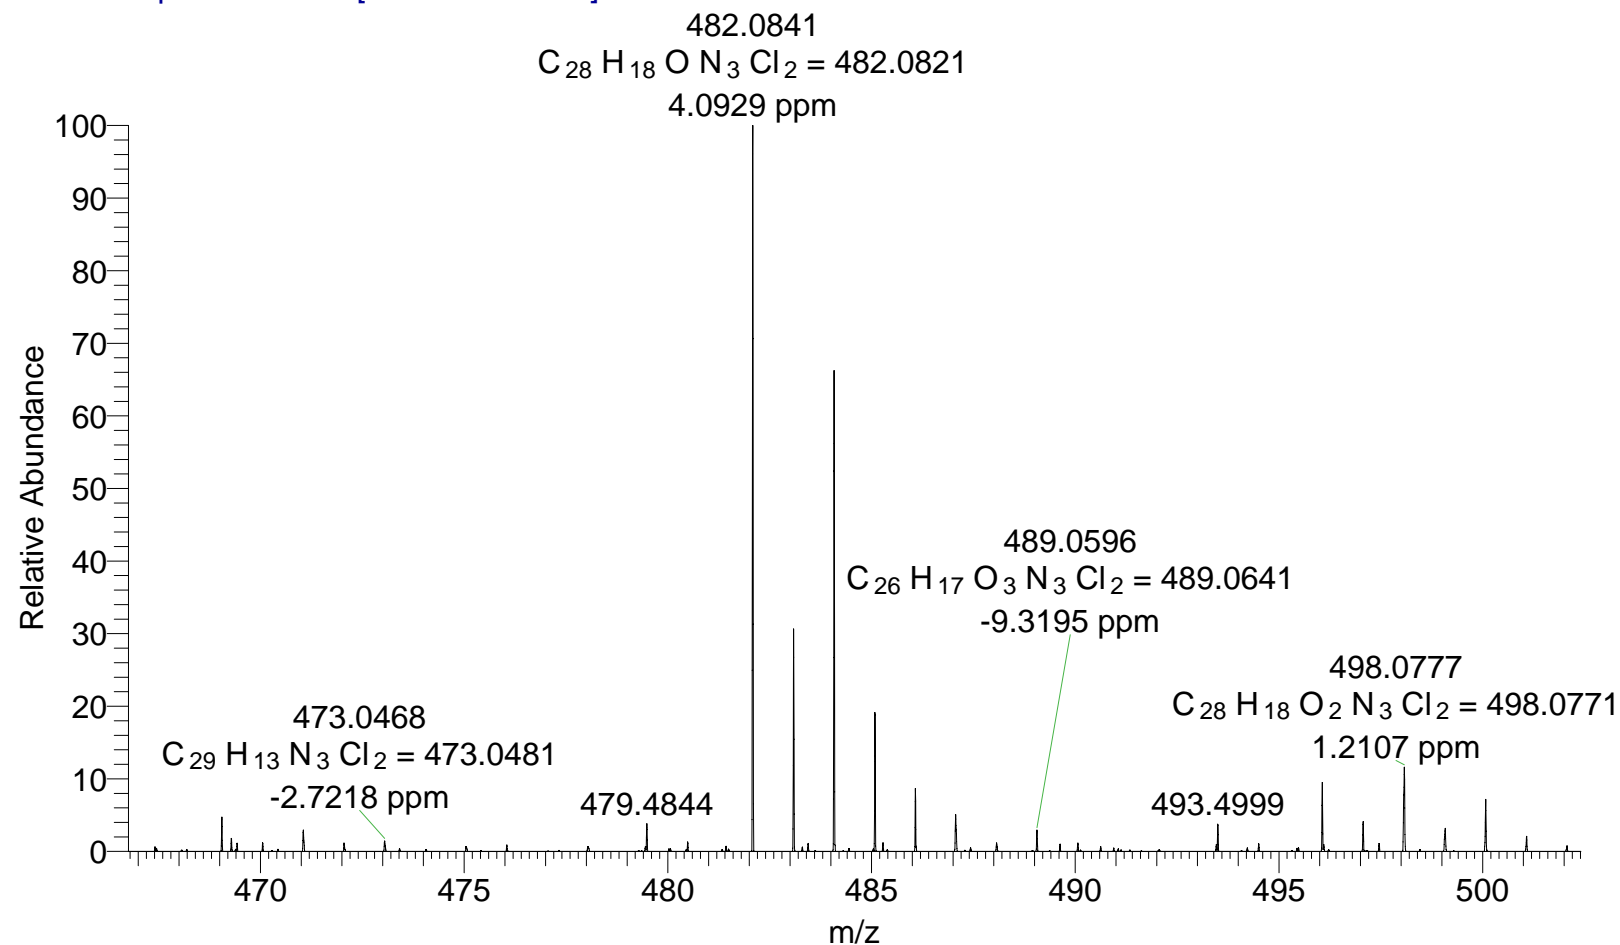

RT: 0.00 - 9.98

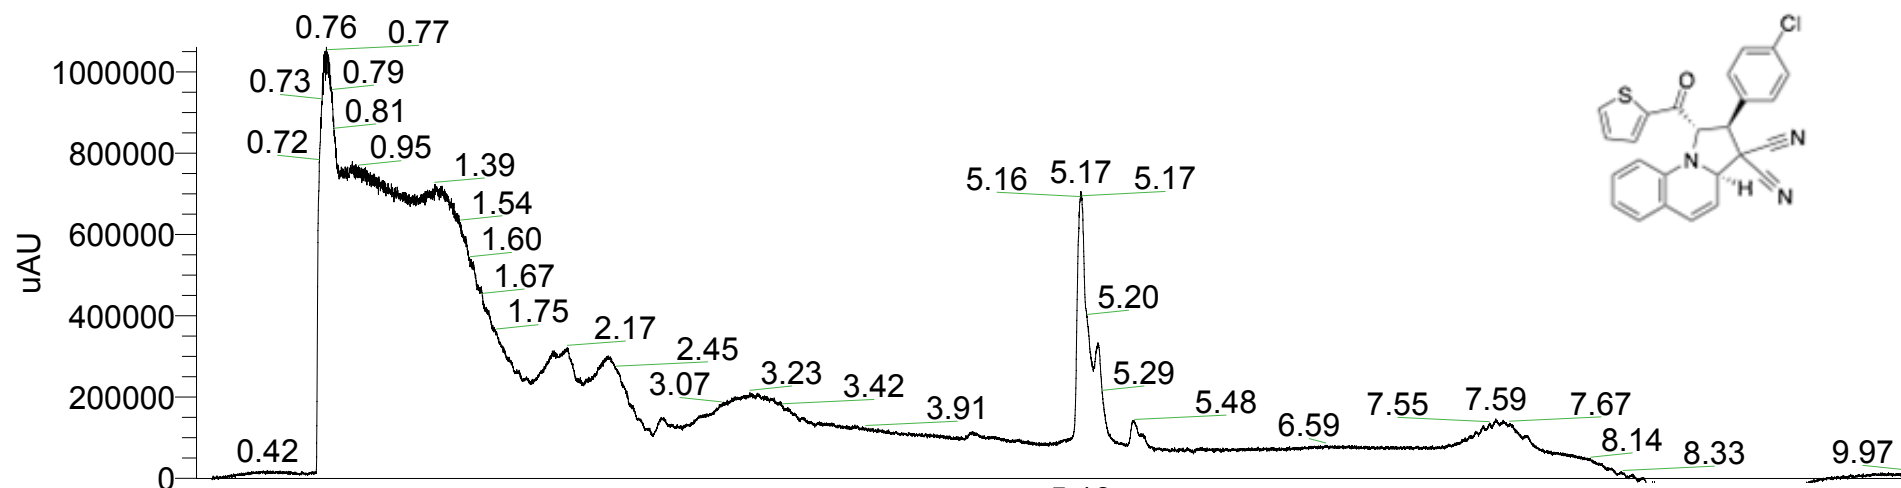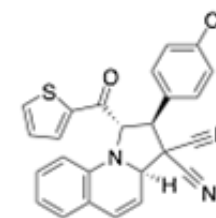

NL:  
1.06E6  
Channel A  
UV  
C1000802\_  
1\_1806050  
95823

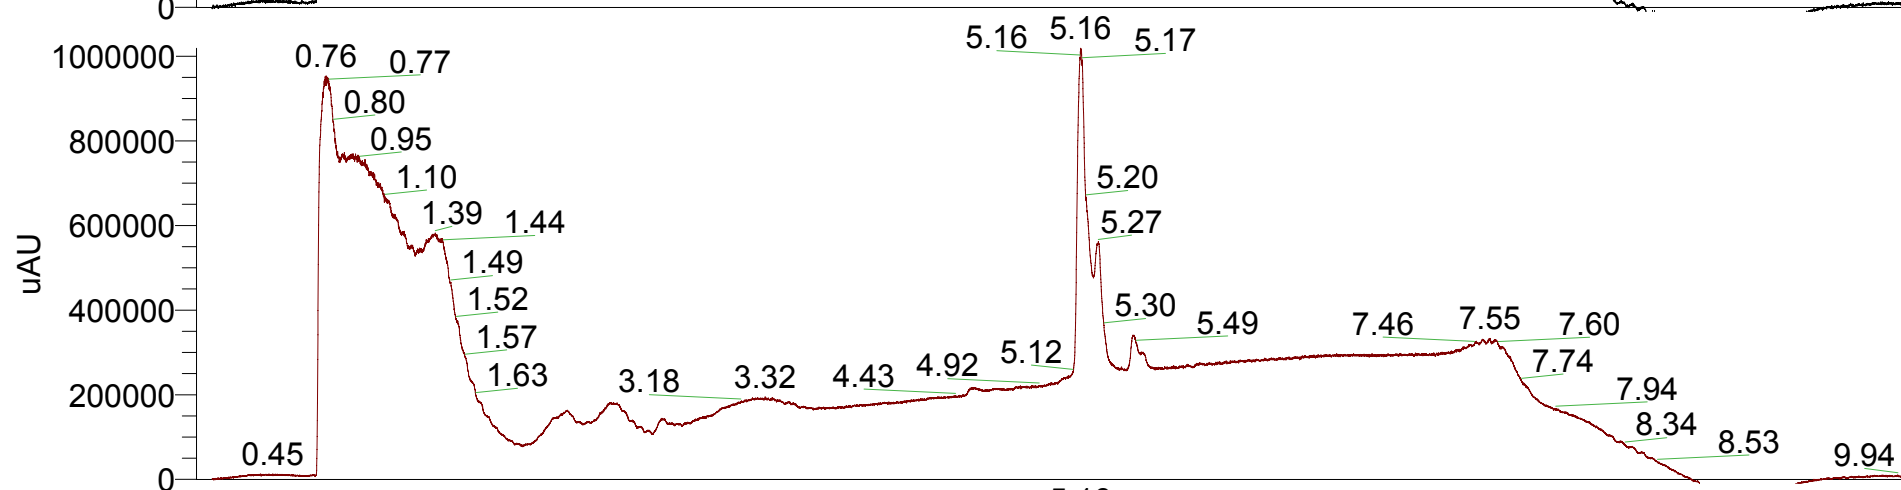

NL:  
1.02E6  
Channel B  
UV  
C1000802\_  
1\_1806050  
95823

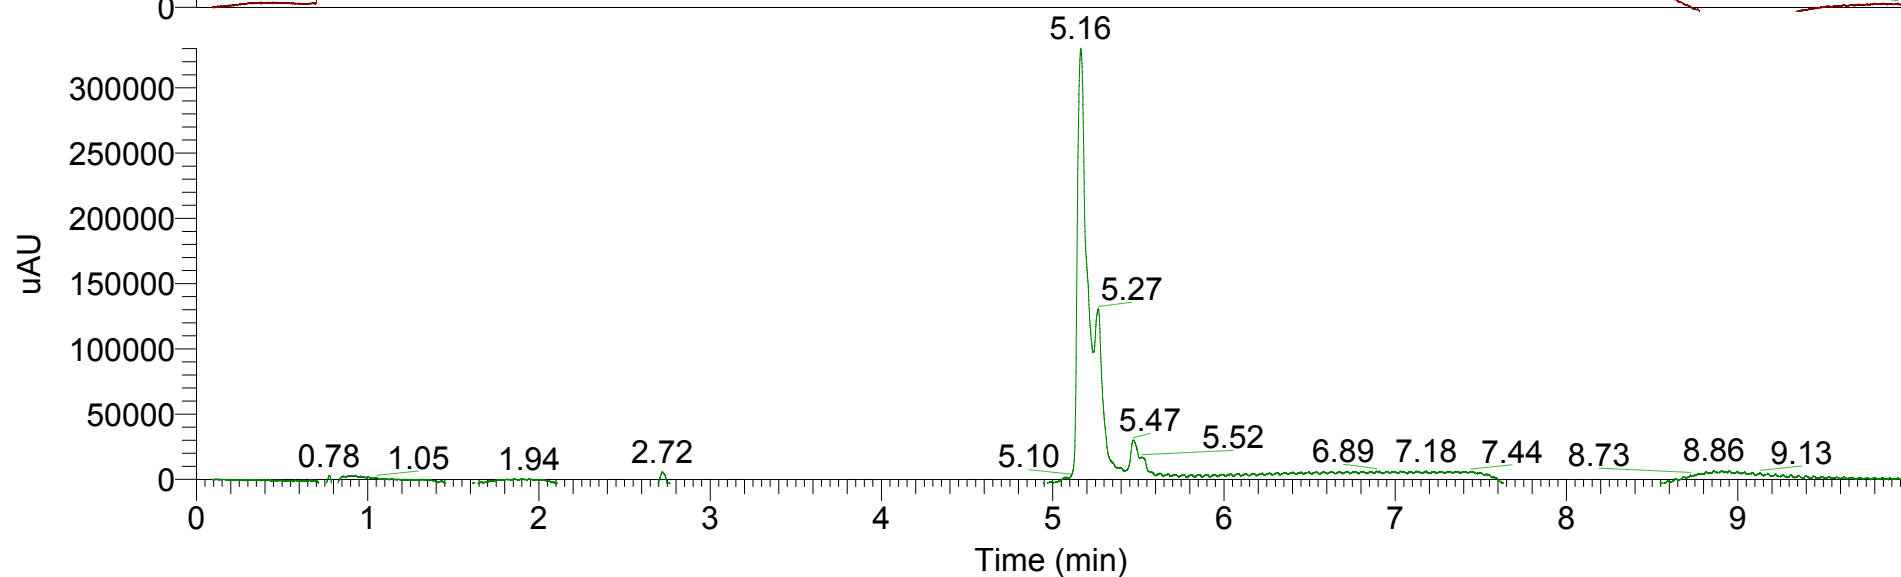

NL:  
3.30E5  
Channel C  
UV  
C1000802\_  
1\_1806050  
95823

RT: 0.70 - 0.91

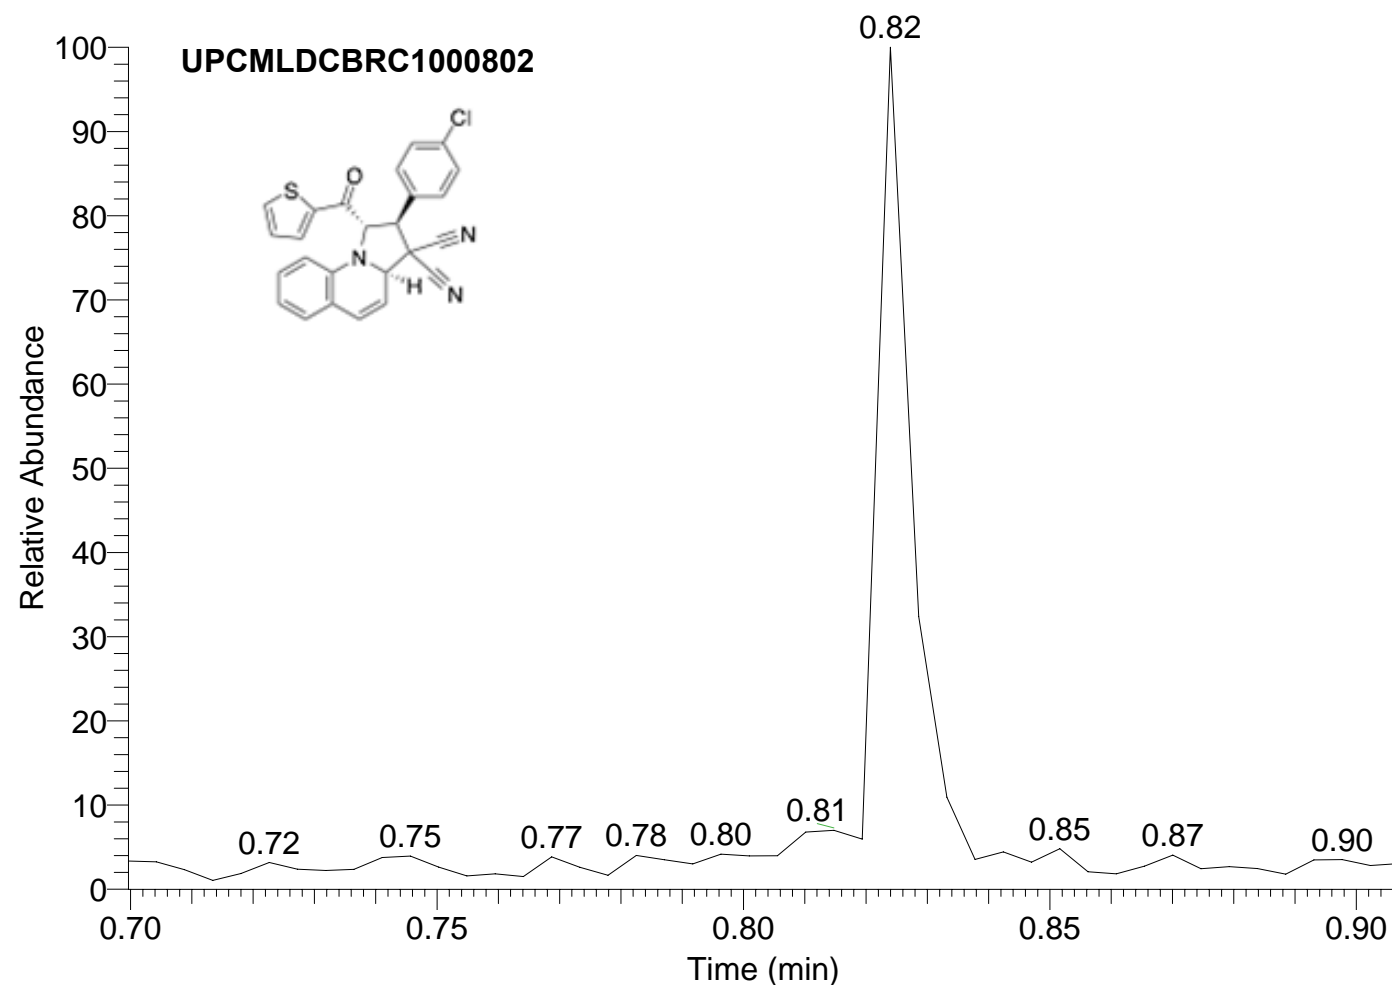

NL:  
5.06E7  
TIC F: FTMS -  
p ESI Full ms  
[150.00-  
2000.00] MS  
C1000802\_DI

C1000802\_DI #177-180 RT: 0.82-0.83 AV: 4 NL: 5.03E5  
T: FTMS - p ESI Full ms [150.00-2000.00]

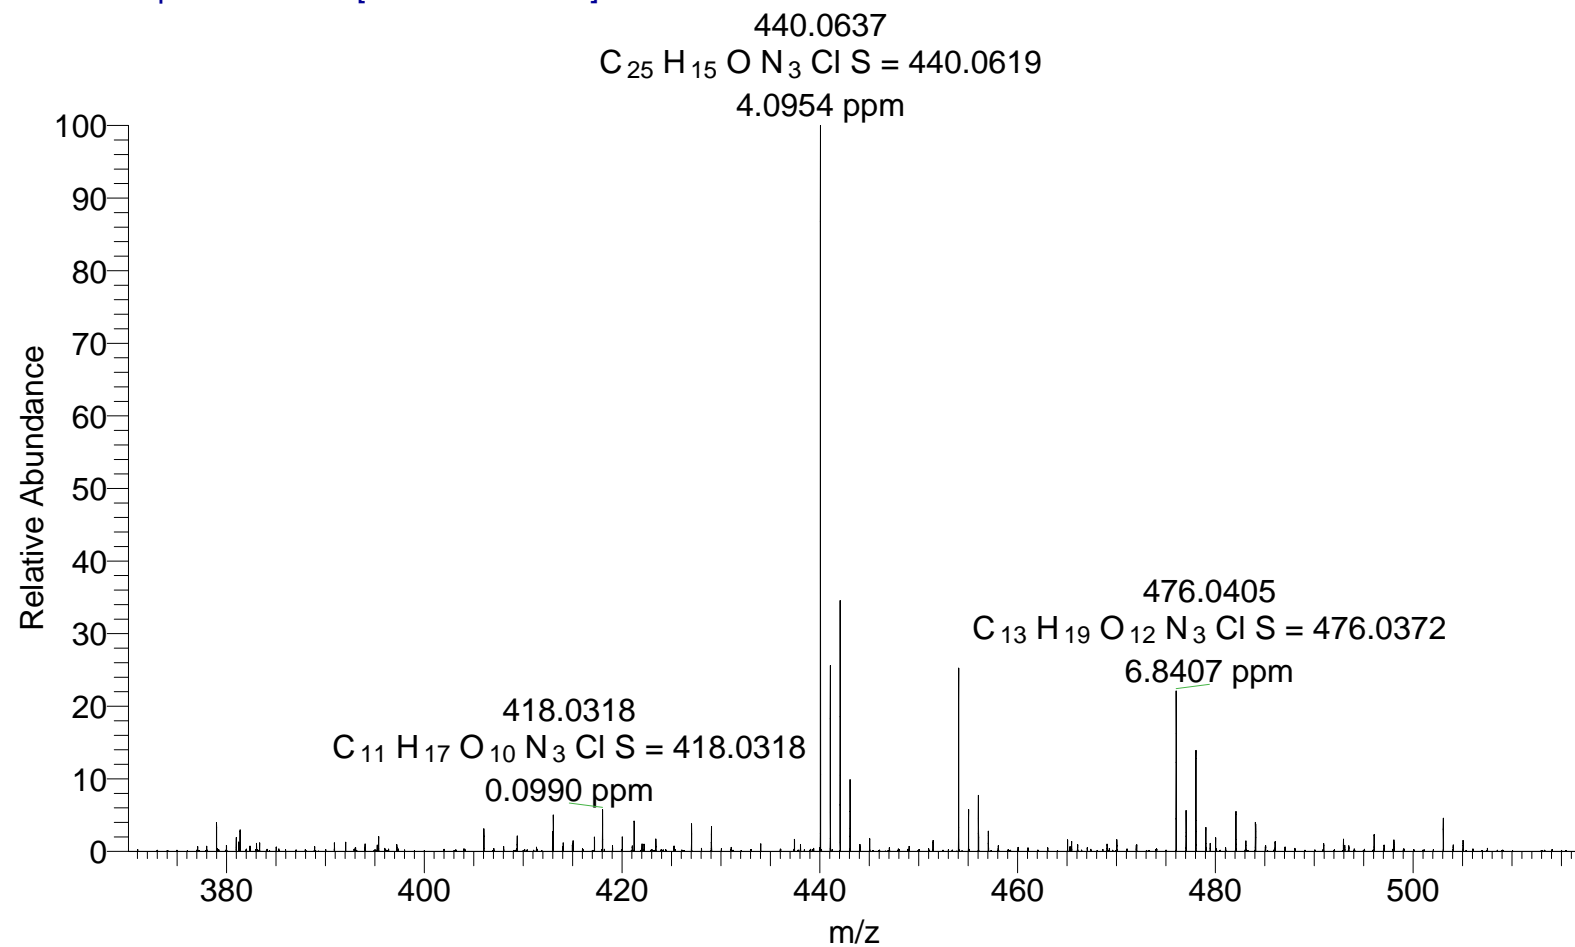

NL:  
1.10E6  
Channel A  
UV  
C1001299\_  
1

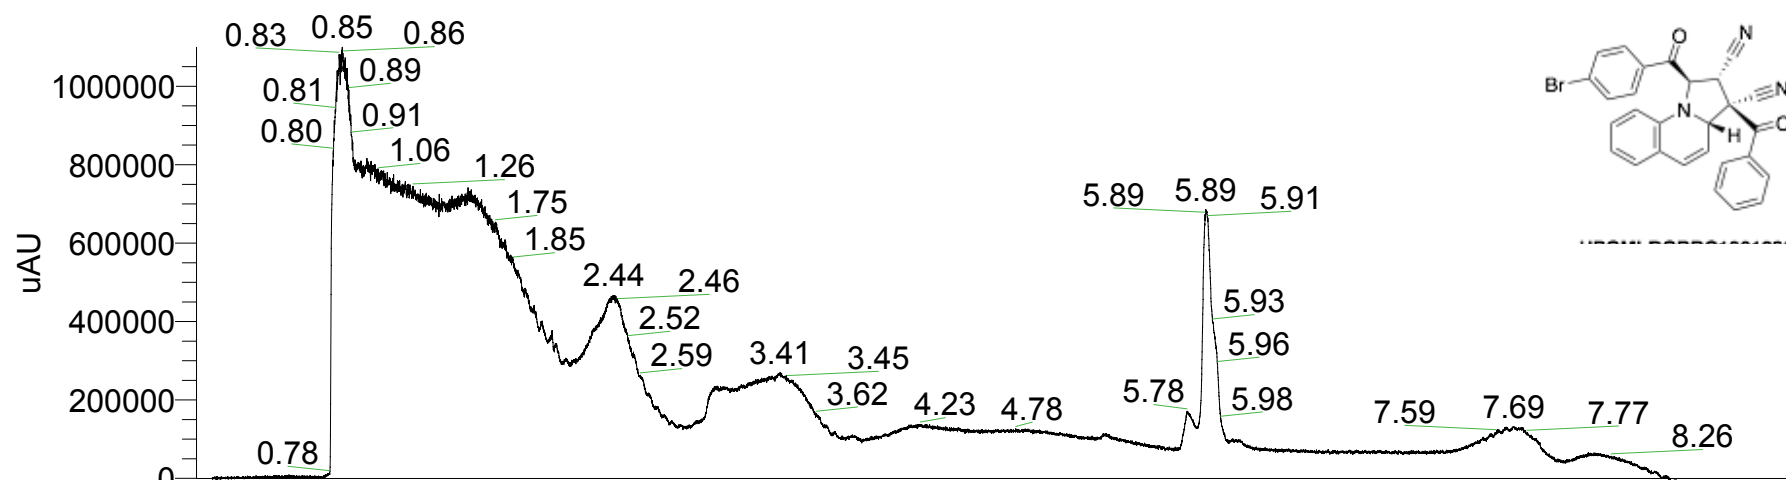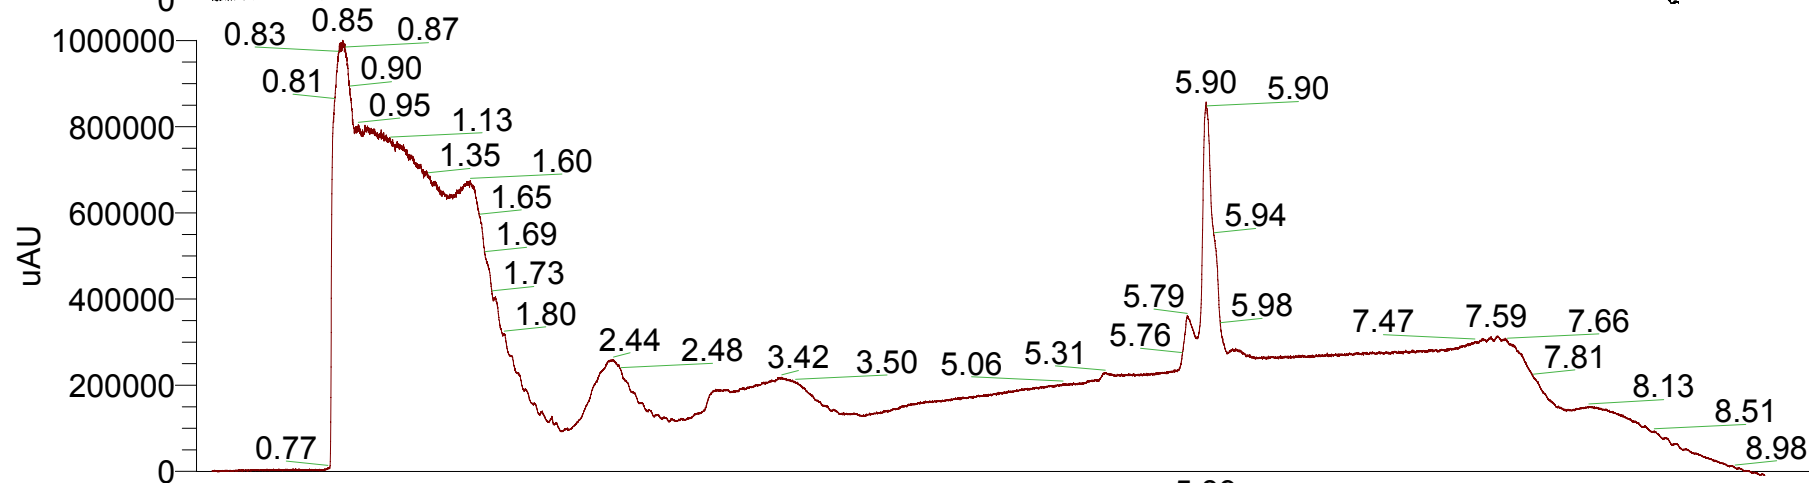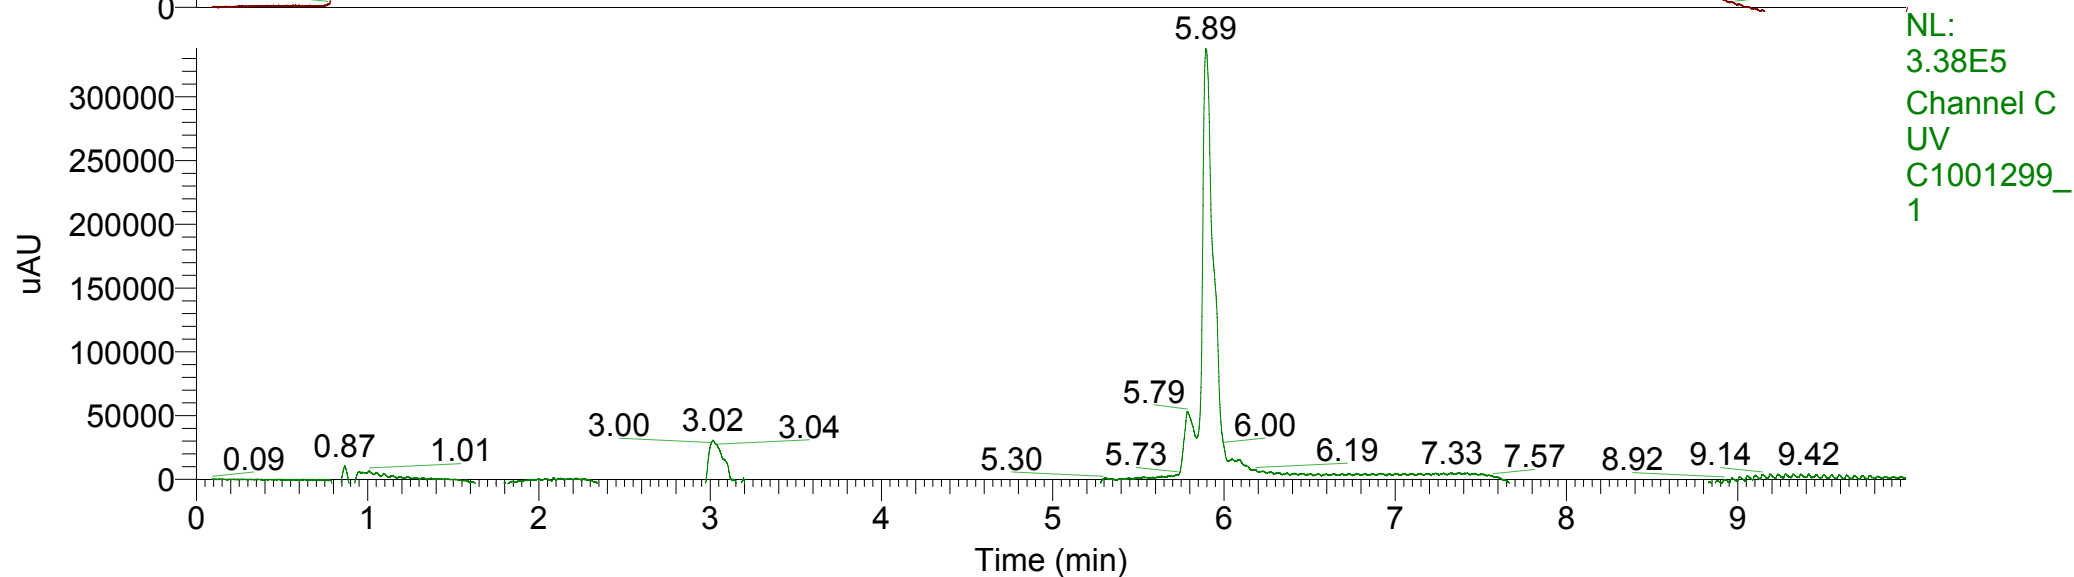



RT: 1.52 - 2.03

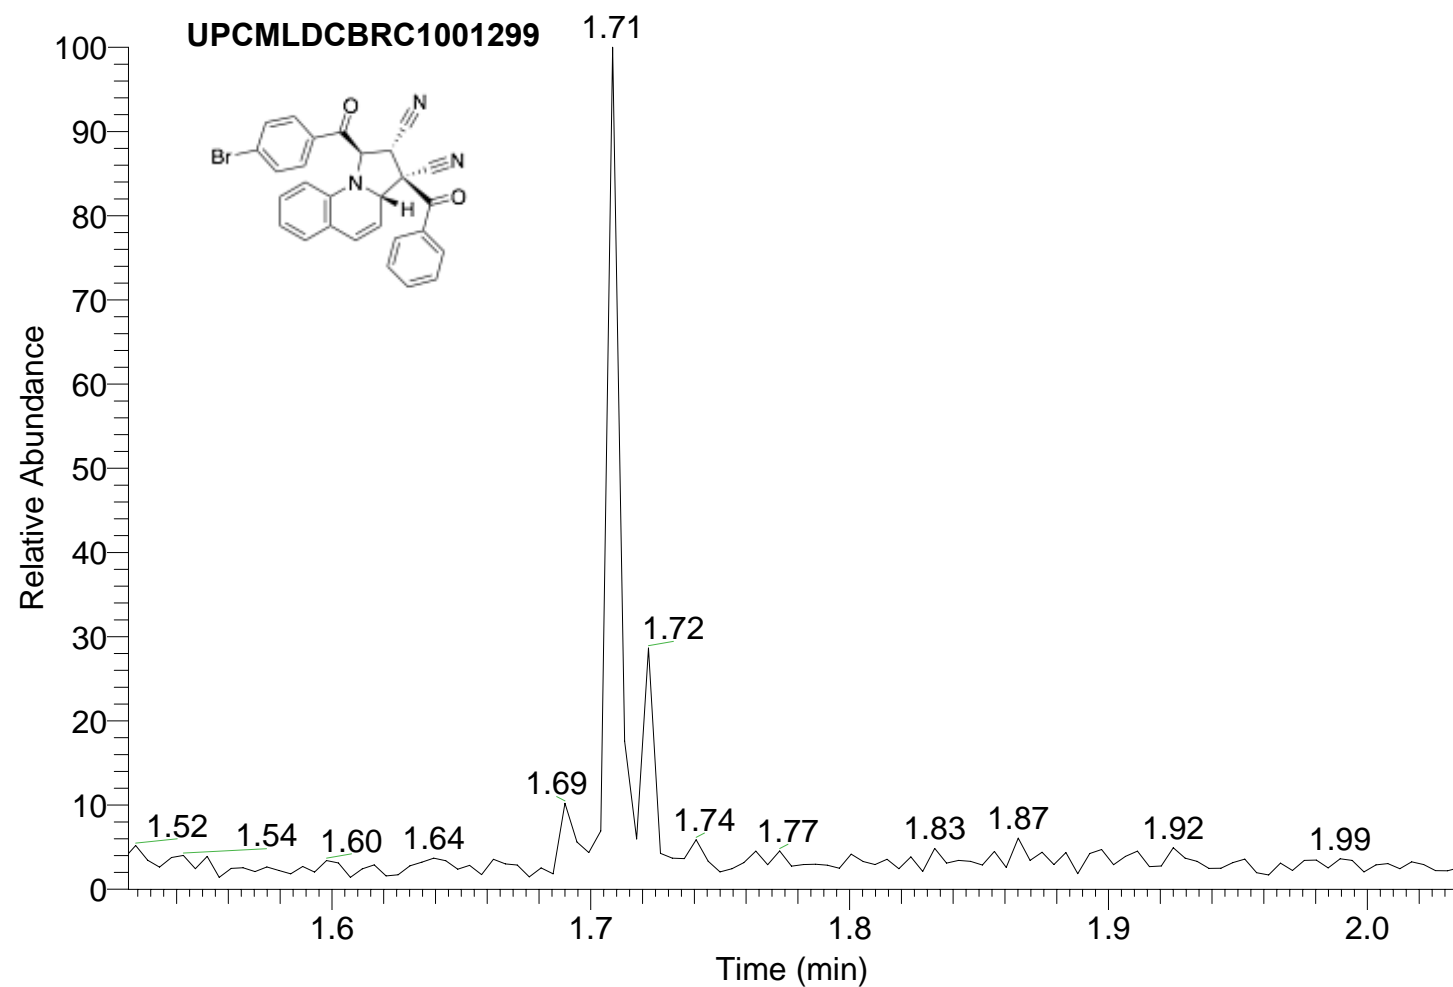

NL:  
5.09E7  
TIC MS  
C1001299\_  
DI

C1001299\_DI #369 RT: 1.70 AV: 1 NL: 4.85E3  
T: FTMS - p ESI Full ms [150.00-2000.00]

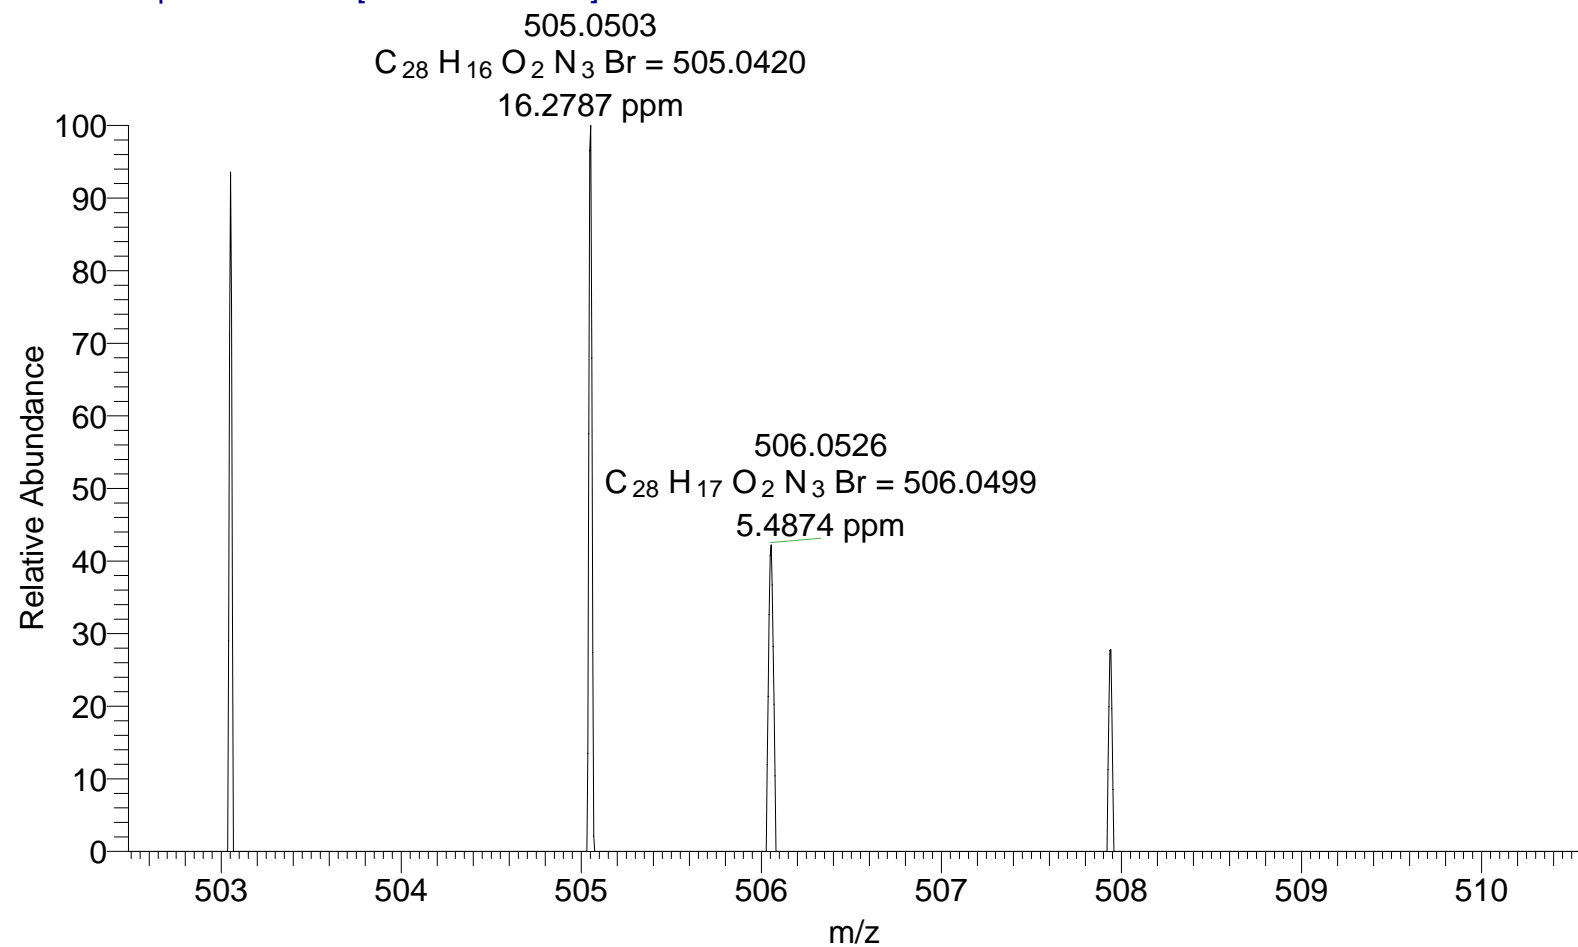

RT: 0.00 - 9.98

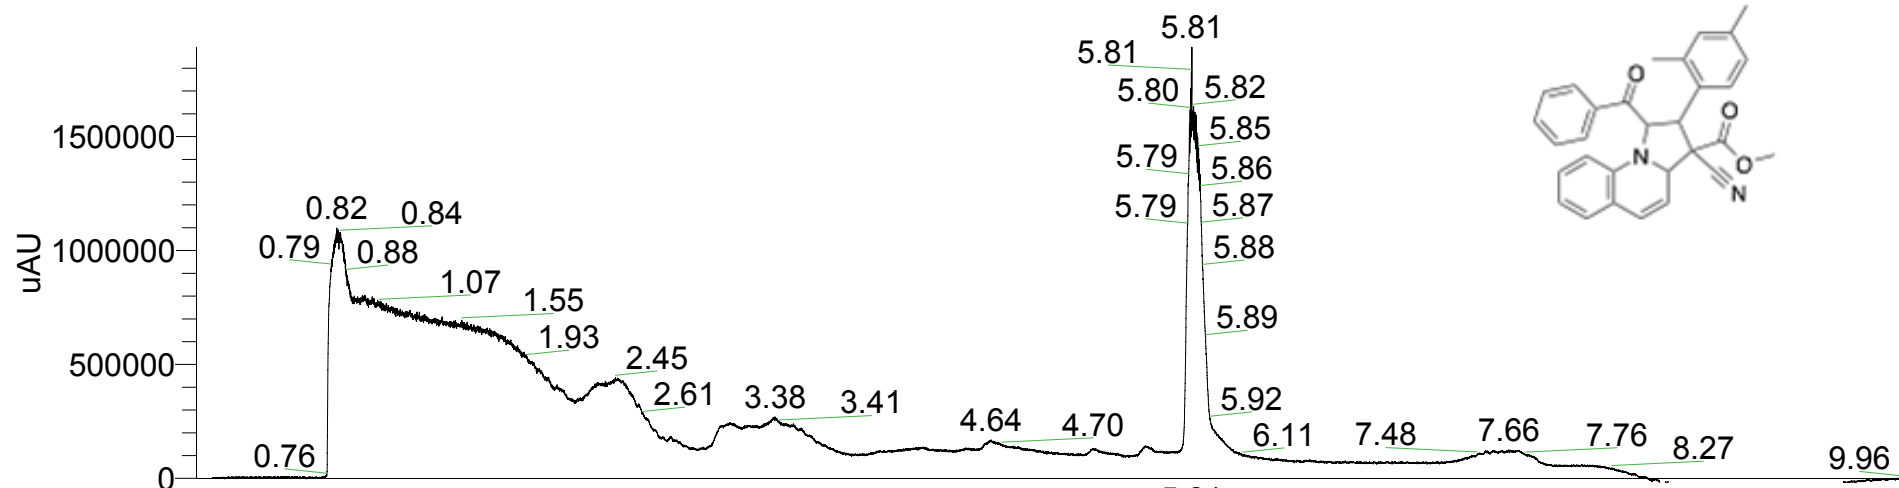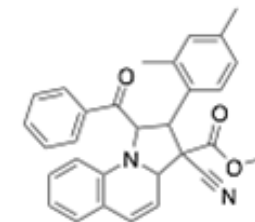

NL:  
1.89E6  
Channel A  
UV  
C1002602\_  
1

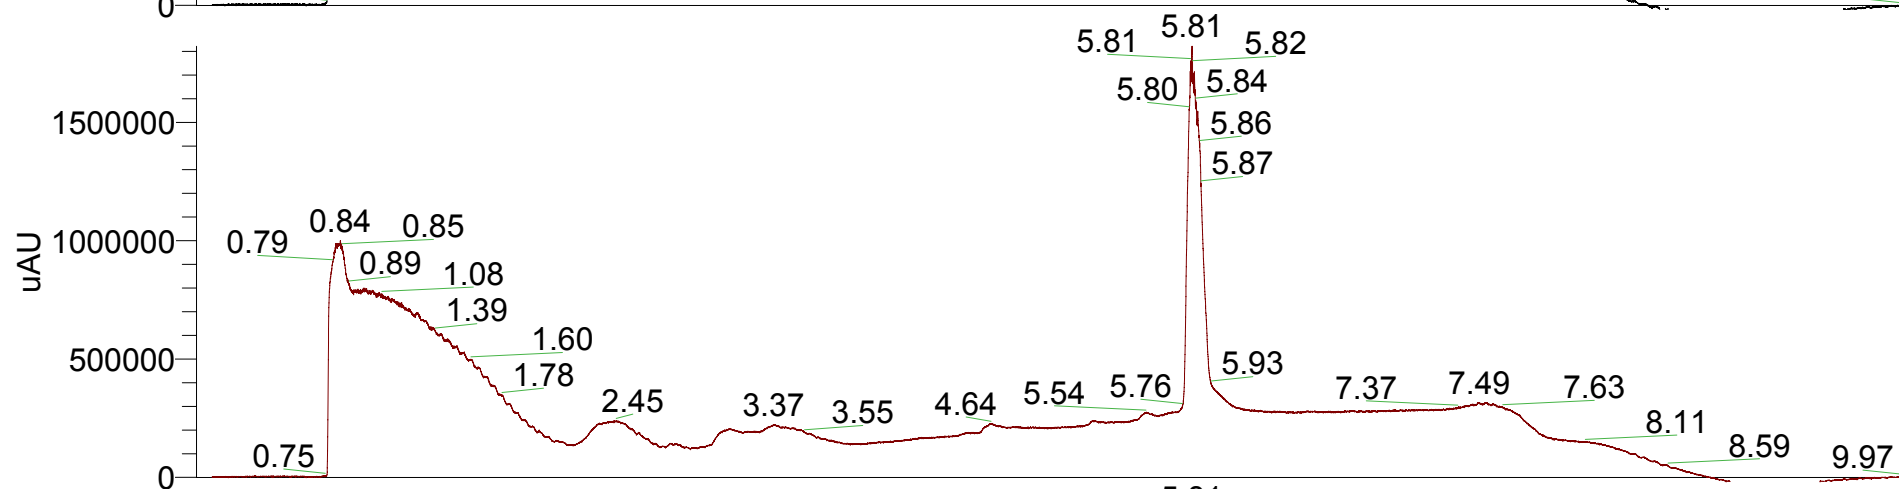

NL:  
1.82E6  
Channel B  
UV  
C1002602\_  
1

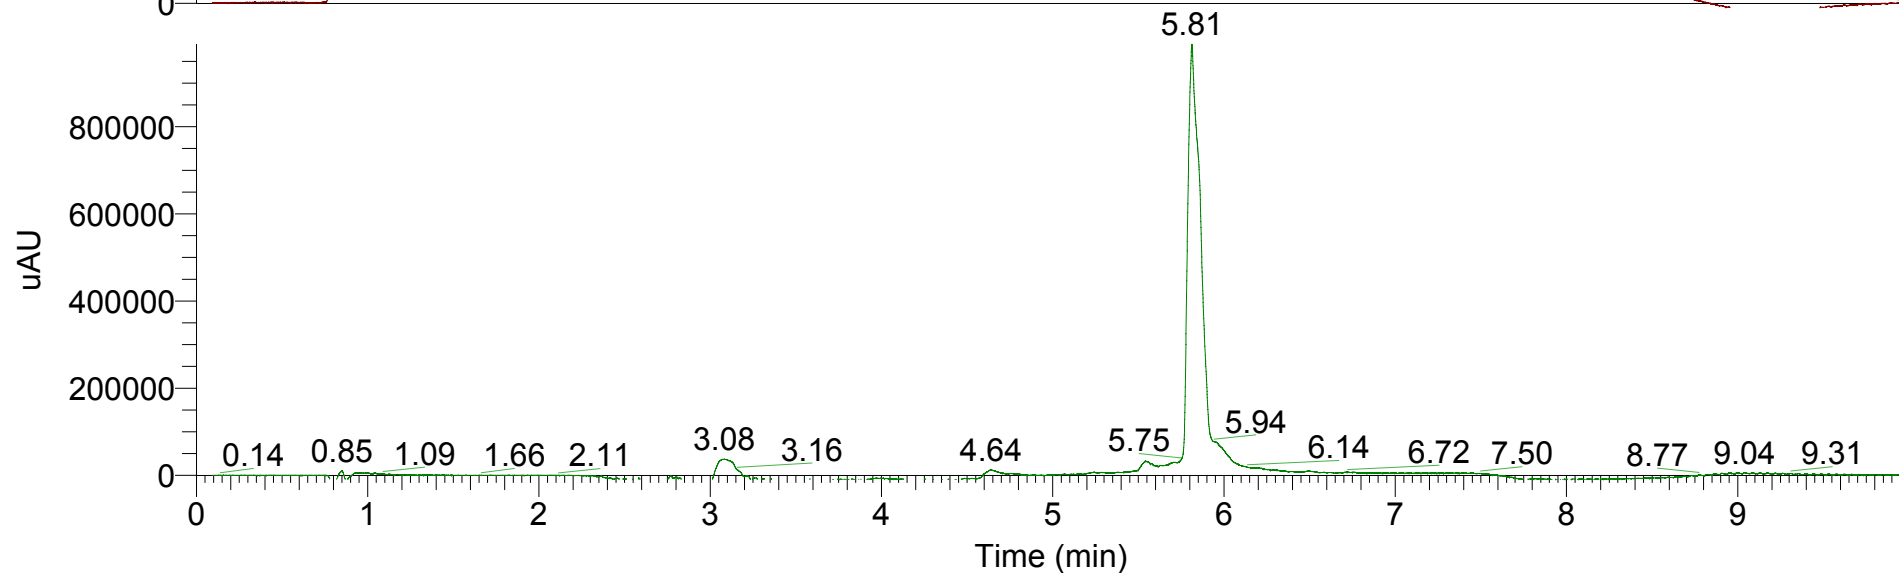

NL:  
9.89E5  
Channel C  
UV  
C1002602\_  
1

RT: 3.41 - 4.50

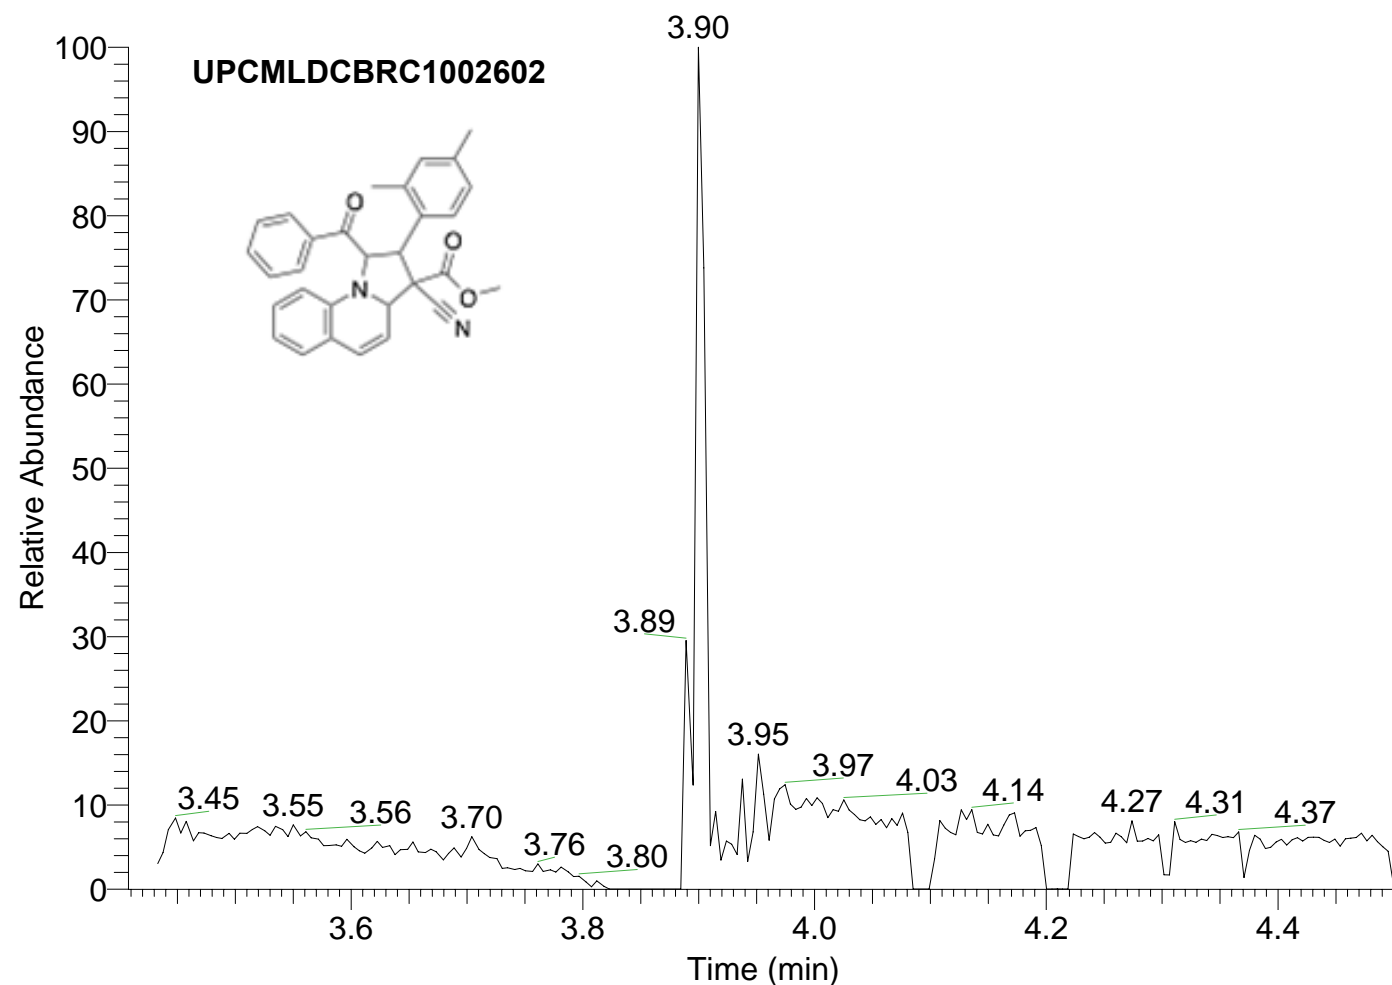

NL:  
8.53E7  
TIC F: FTMS -  
p ESI Full ms  
[150.00-  
2000.00] MS  
C1002602\_DI

C1002602\_DI #823-828 RT: 3.89-3.91 AV: 6 NL: 2.72E4  
T: FTMS - p ESI Full ms [150.00-2000.00]

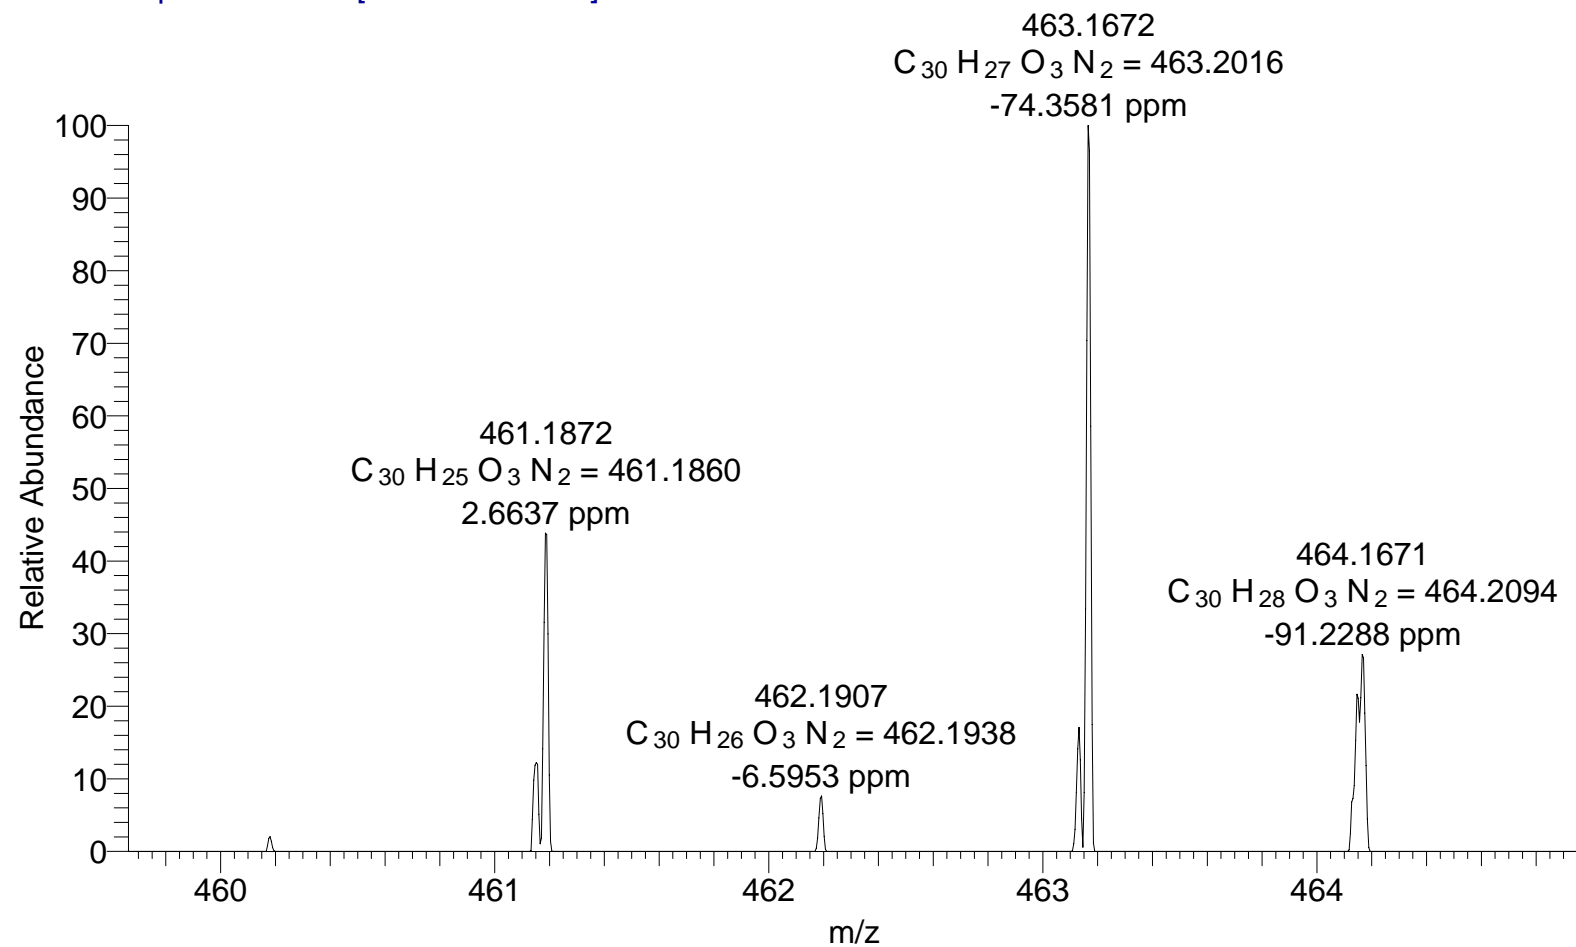

RT: 0.00 - 9.98

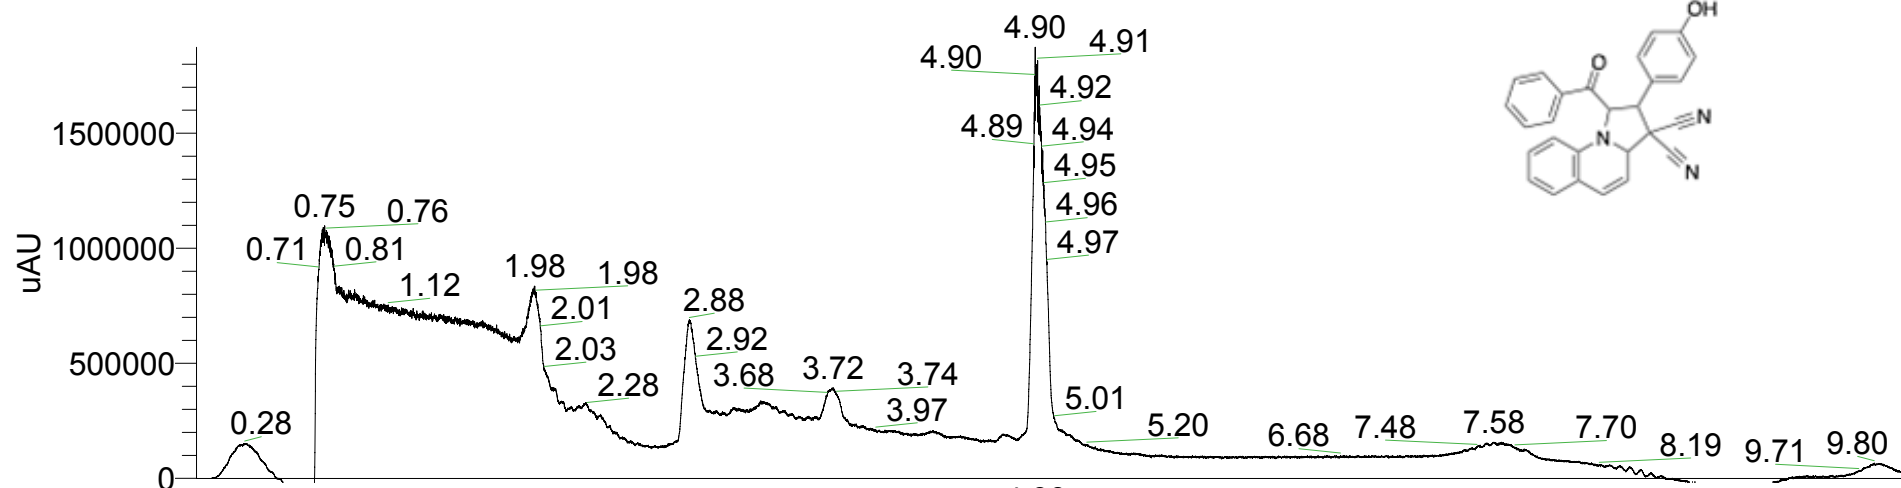

NL:  
1.87E6  
Channel A  
UV  
C1004885\_  
1

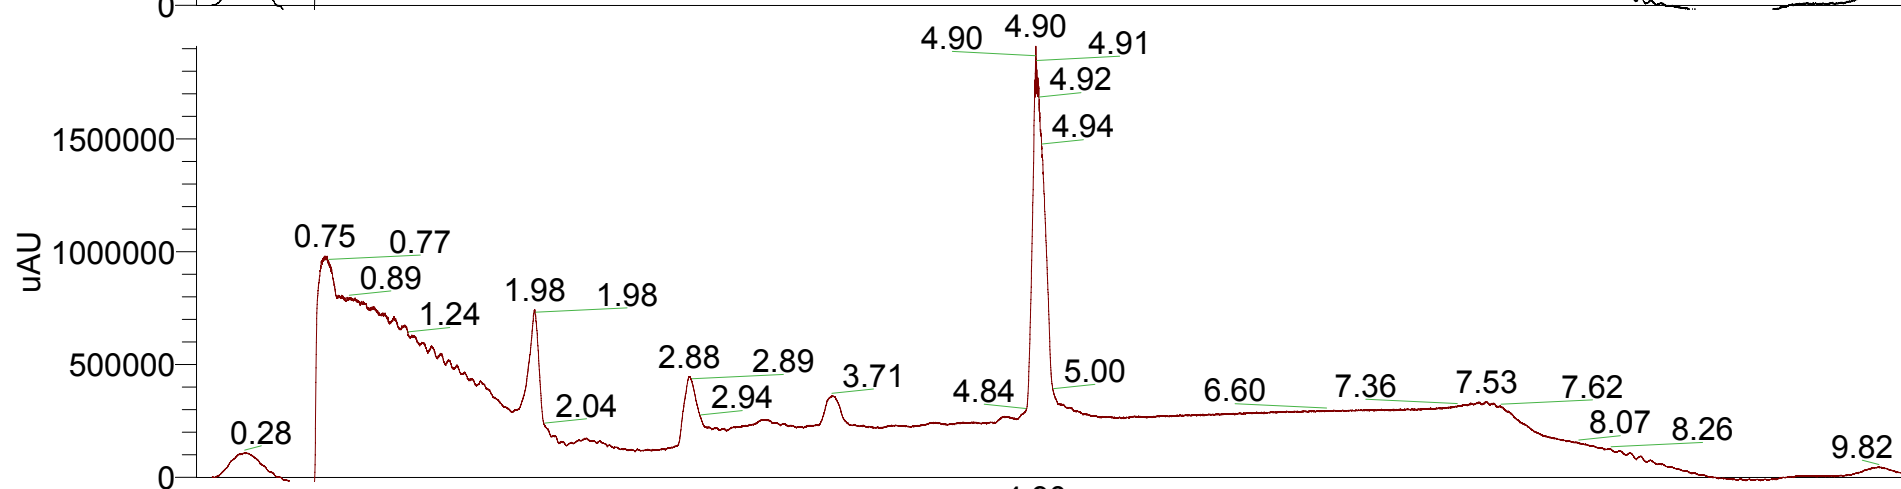

NL:  
1.91E6  
Channel B  
UV  
C1004885\_  
1

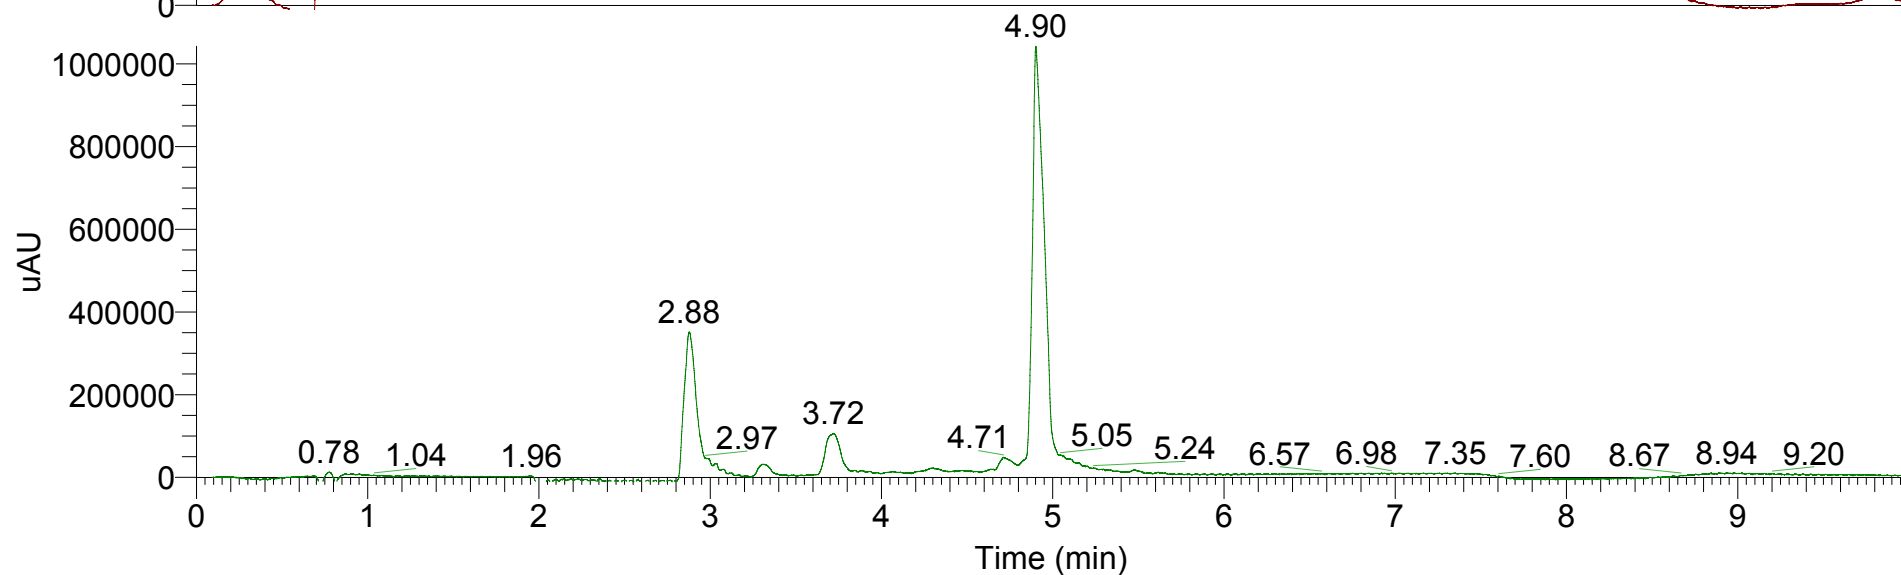

NL:  
1.04E6  
Channel C  
UV  
C1004885\_  
1

RT: 0.09 - 0.54

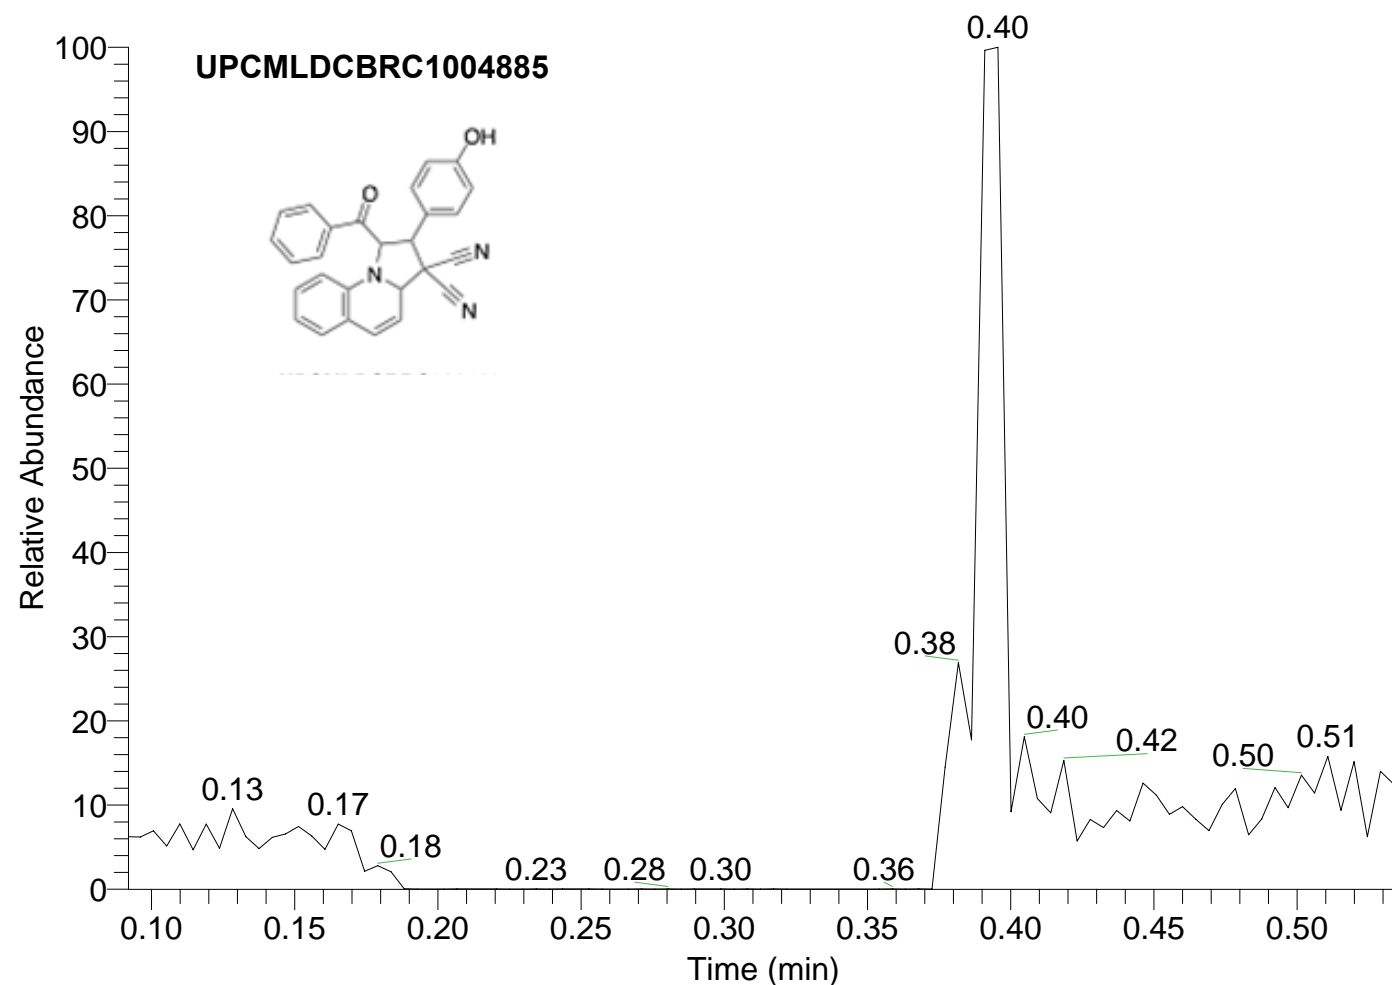

NL:  
5.42E7  
TIC F: FTMS -  
p ESI Full ms  
[150.00-  
2000.00] MS  
C1004885\_DI

C1004885\_DI #83-85 RT: 0.39-0.40 AV: 3 NL: 1.98E6  
T: FTMS - p ESI Full ms [150.00-2000.00]

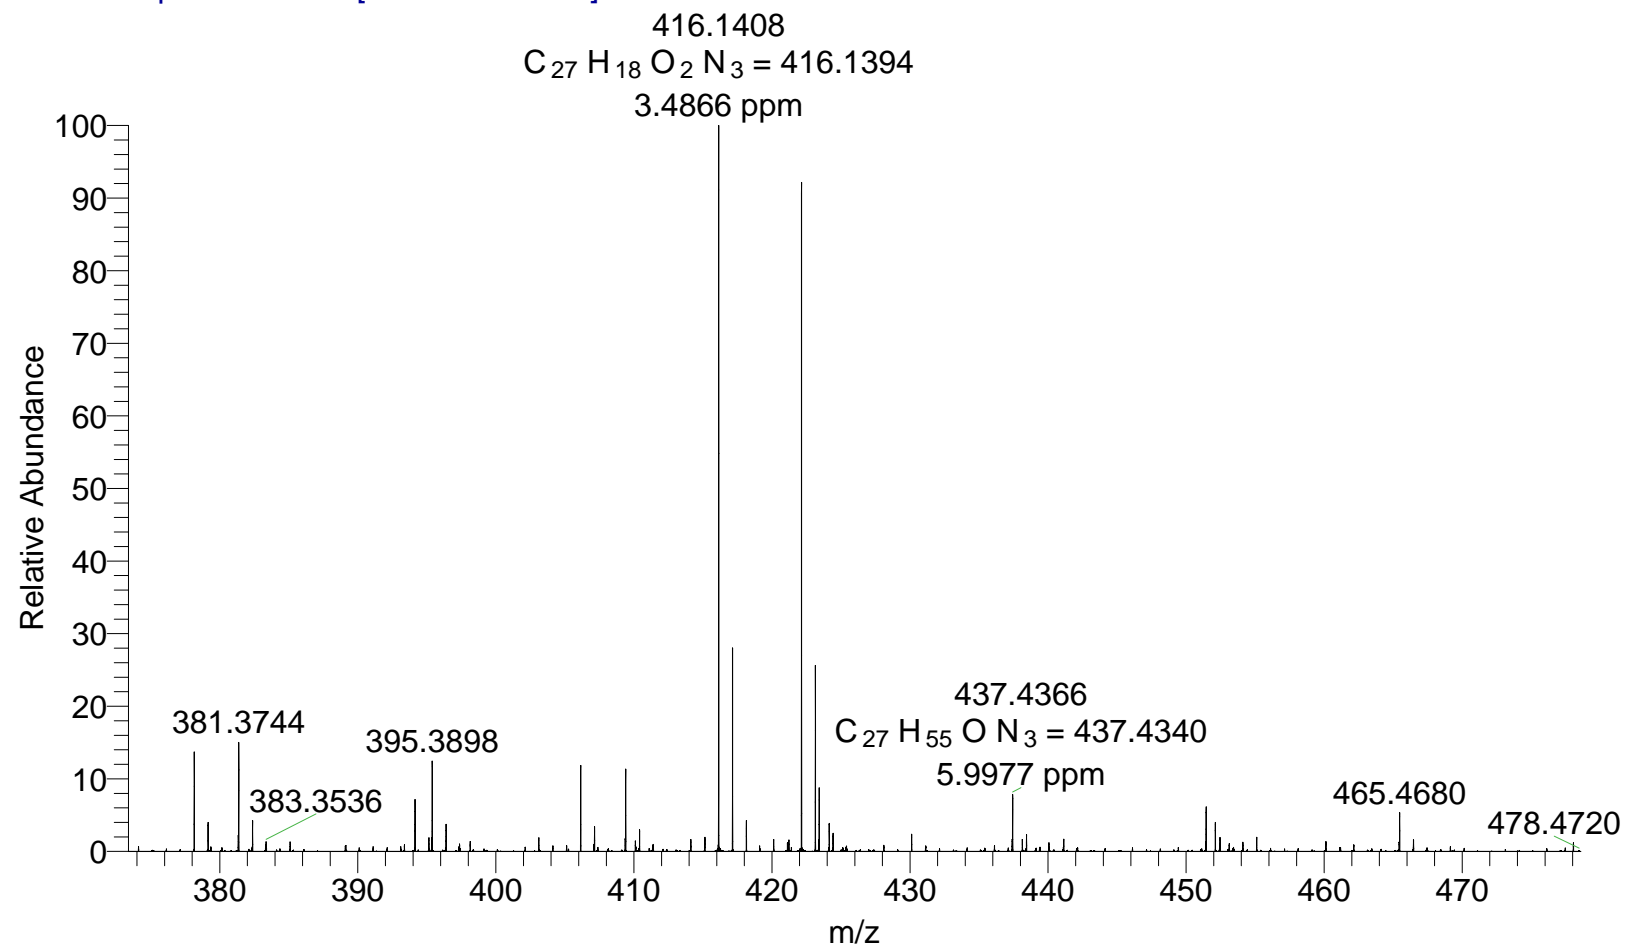

RT: 0.00 - 9.98

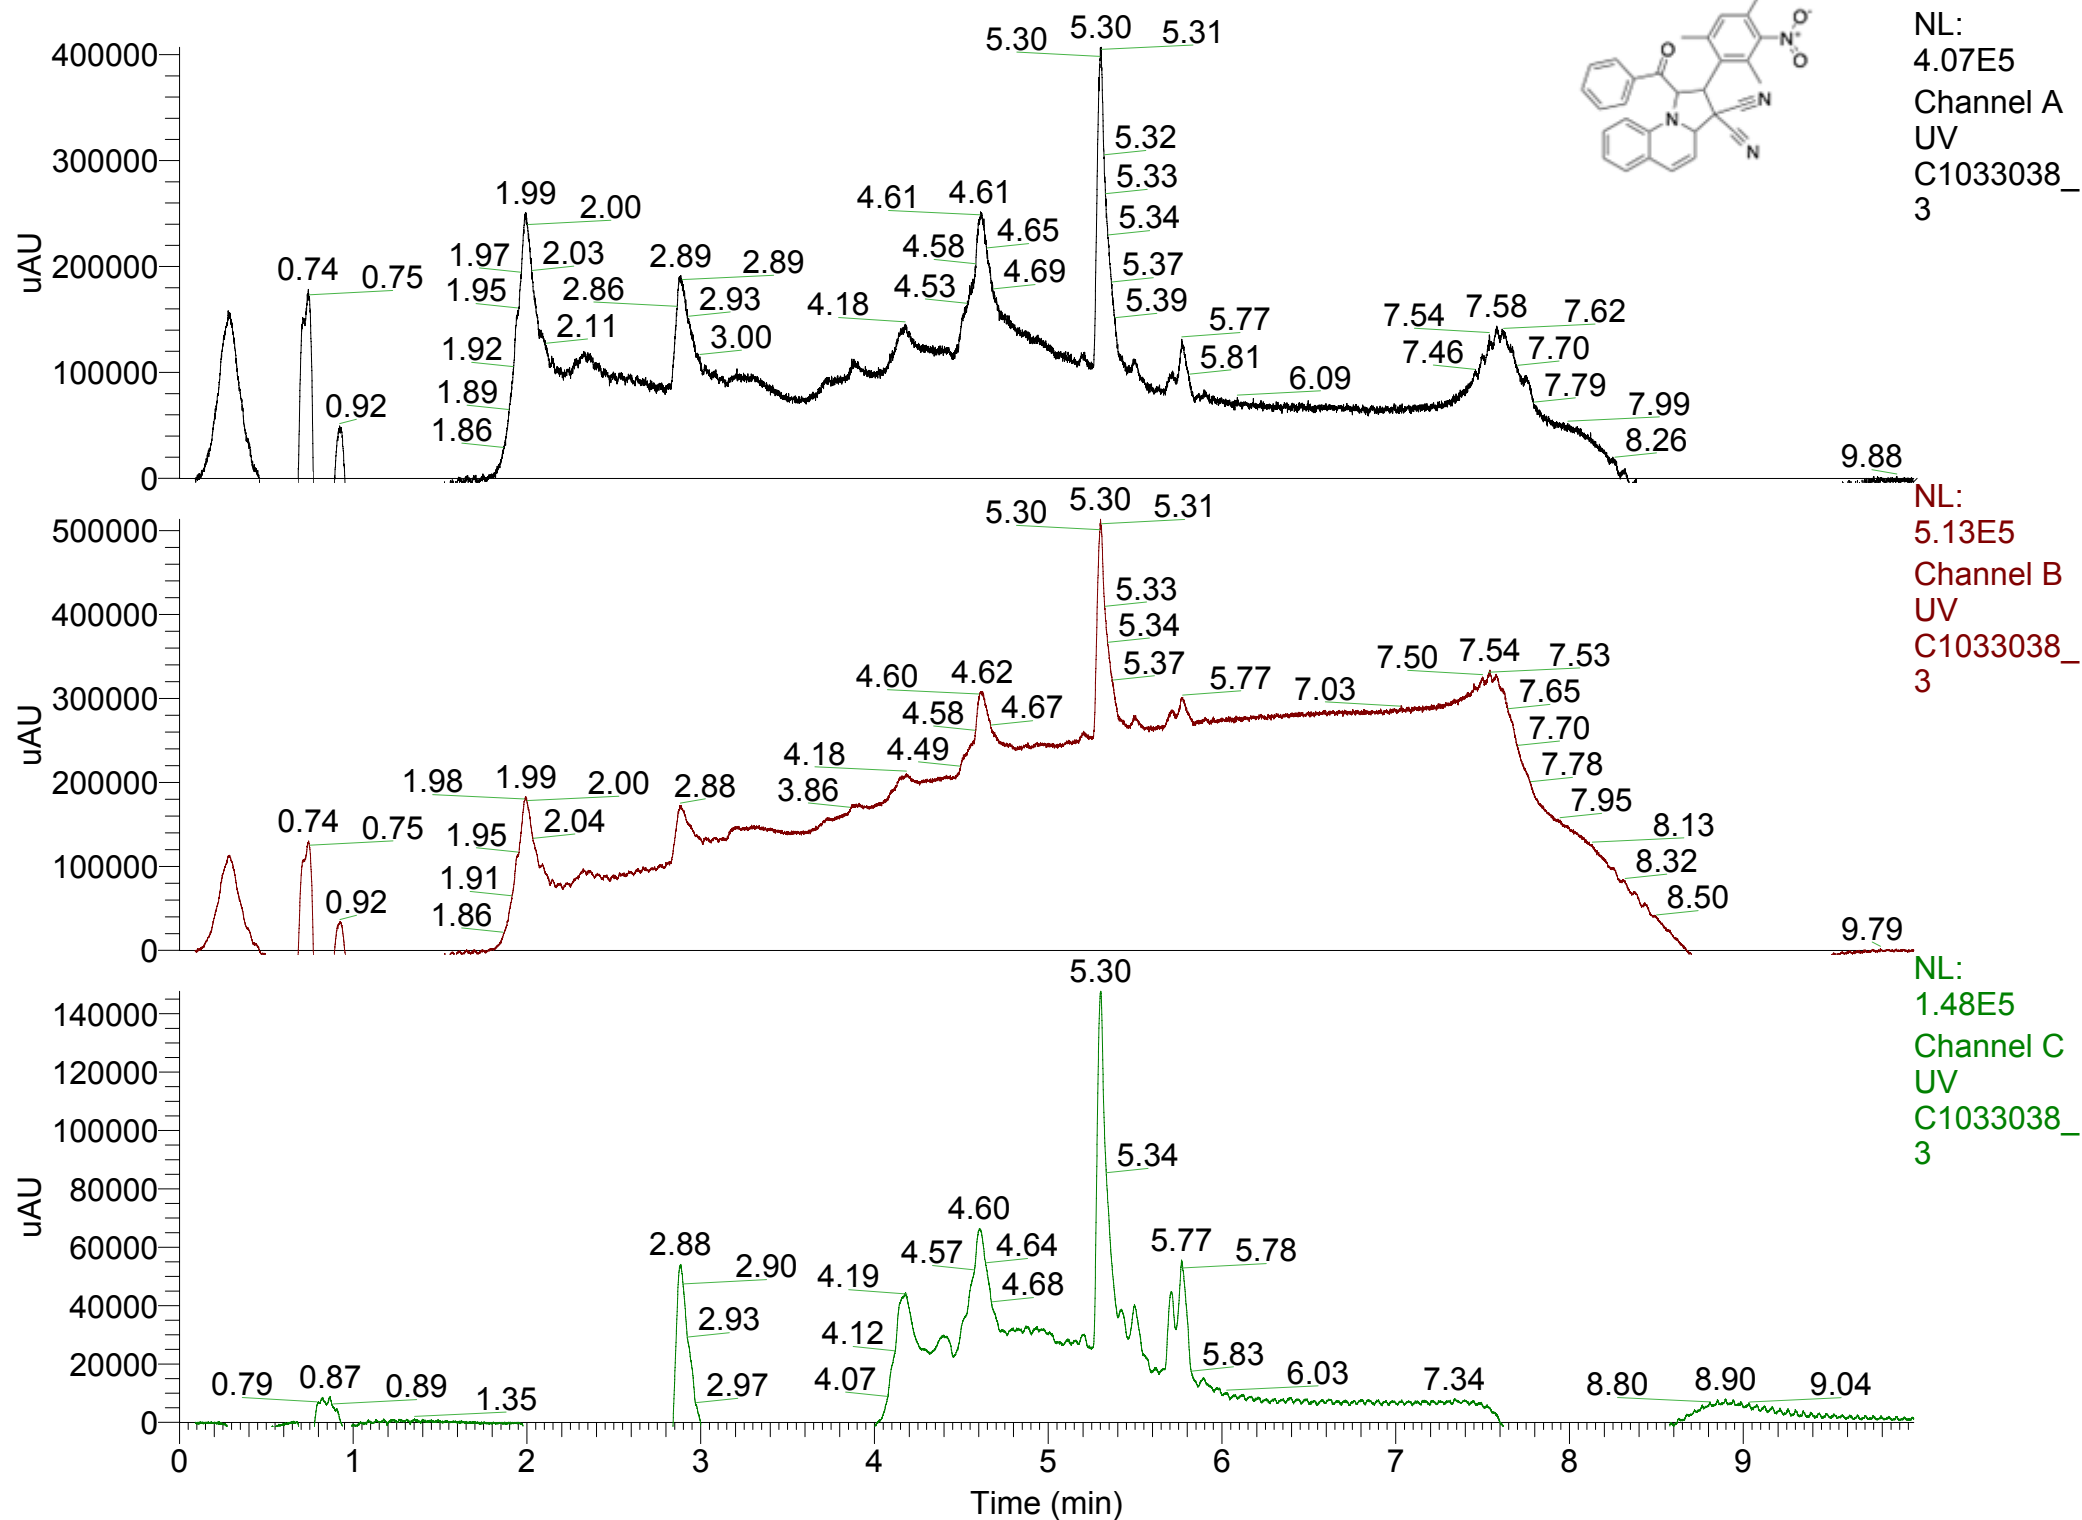

RT: 0.69 - 1.50

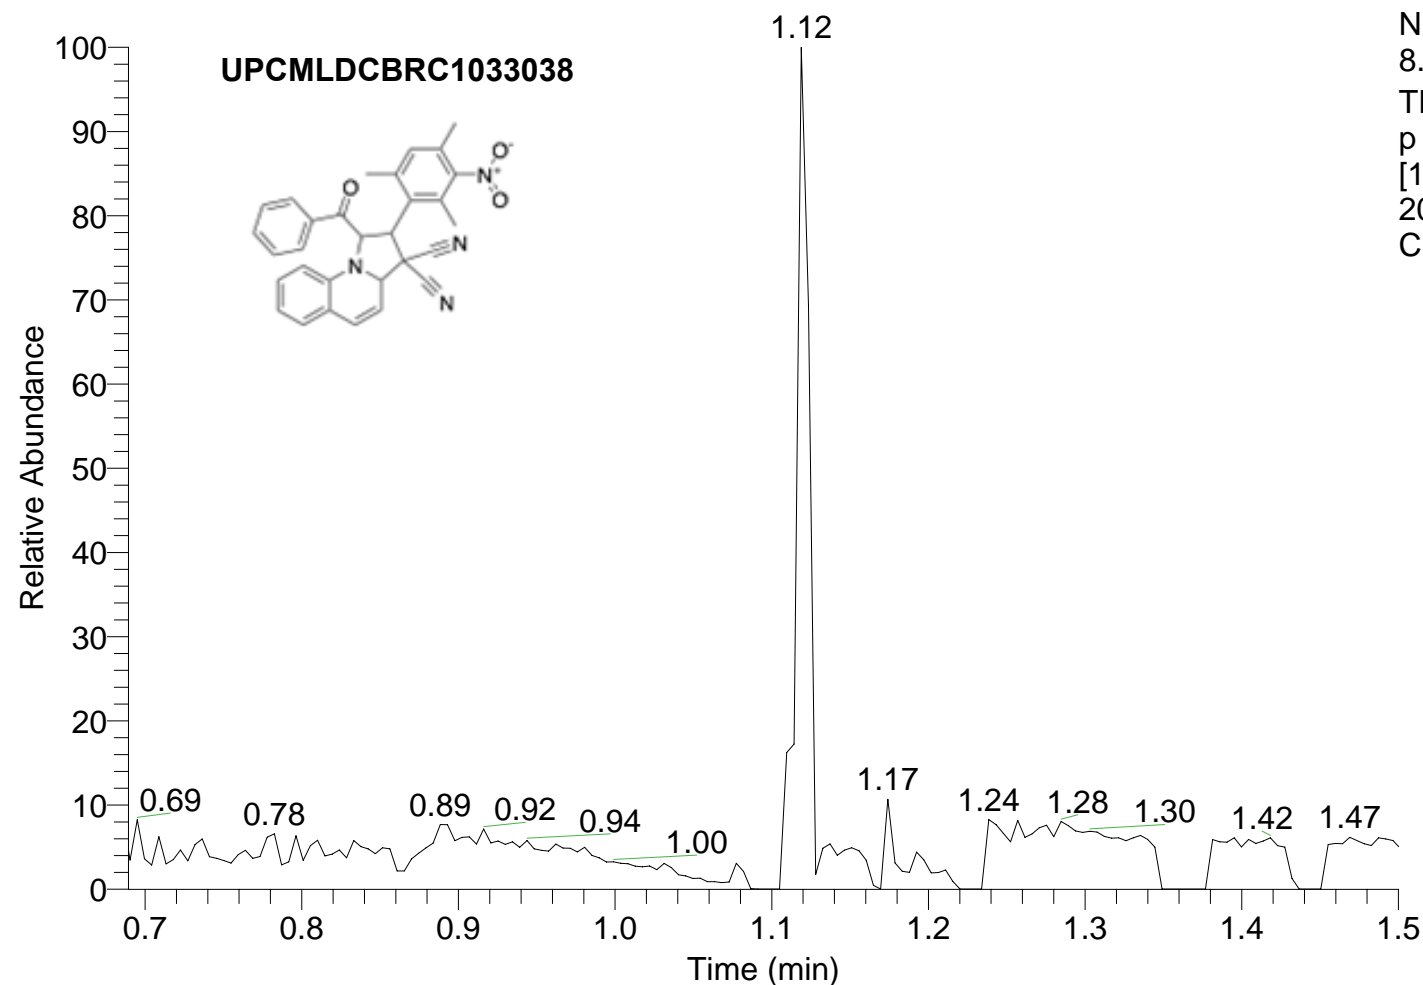

NL:  
8.11E7  
TIC F: FTMS -  
p ESI Full ms  
[150.00-  
2000.00] MS  
C1033038\_DI

C1033038\_DI #240-244 RT: 1.11-1.13 AV: 5 NL: 2.32E5  
T: FTMS - p ESI Full ms [150.00-2000.00]

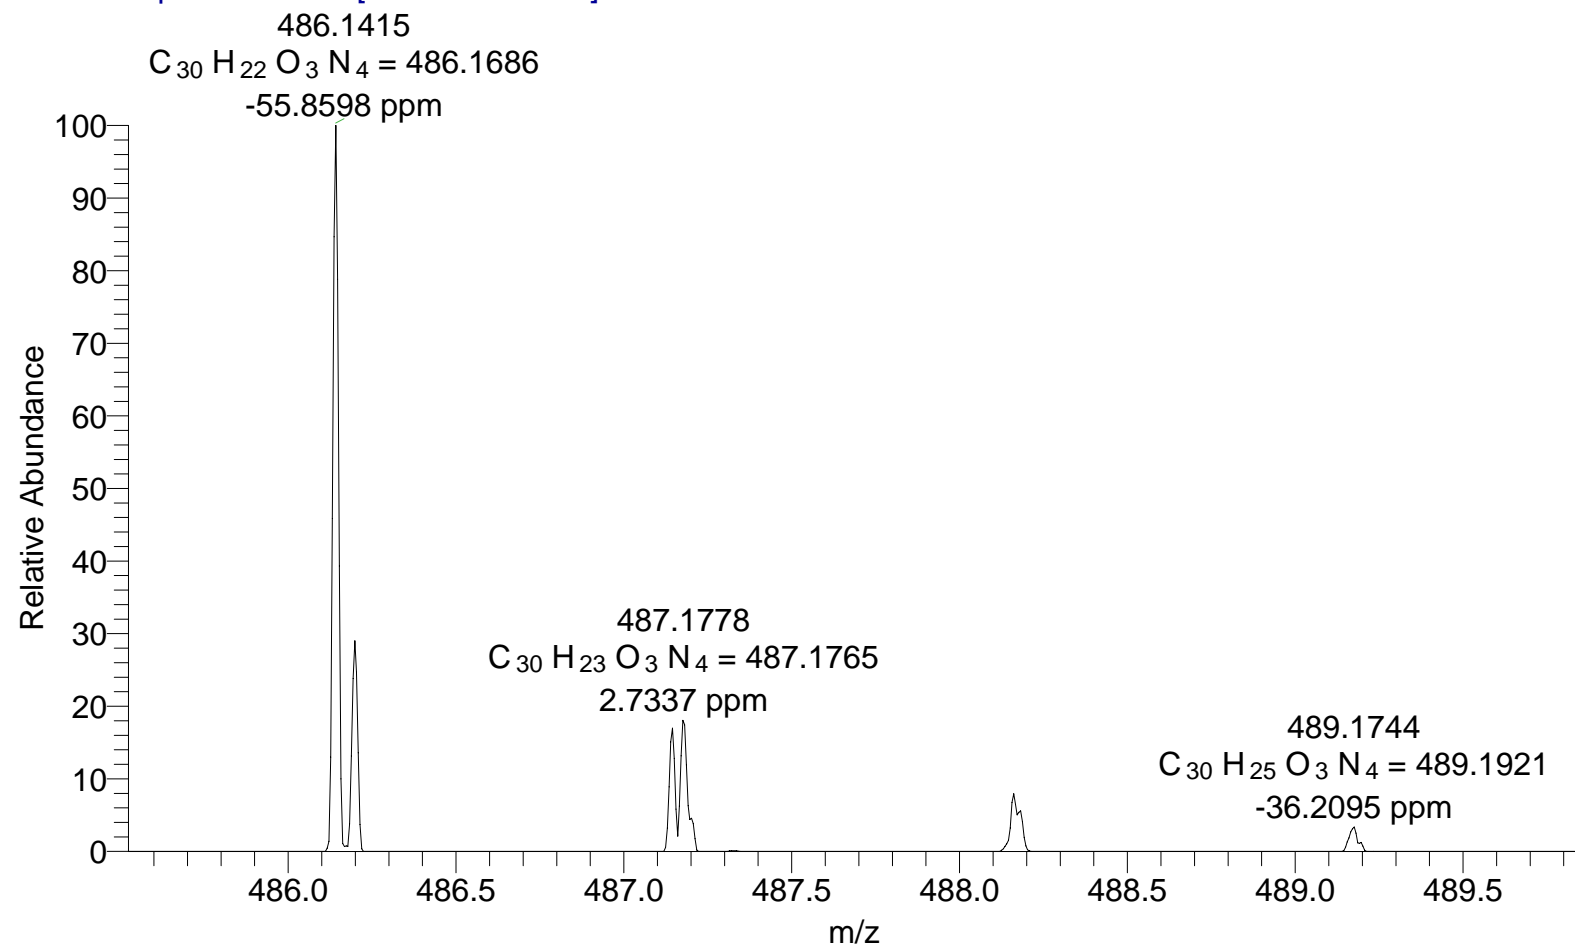

RT: 0.00 - 9.98

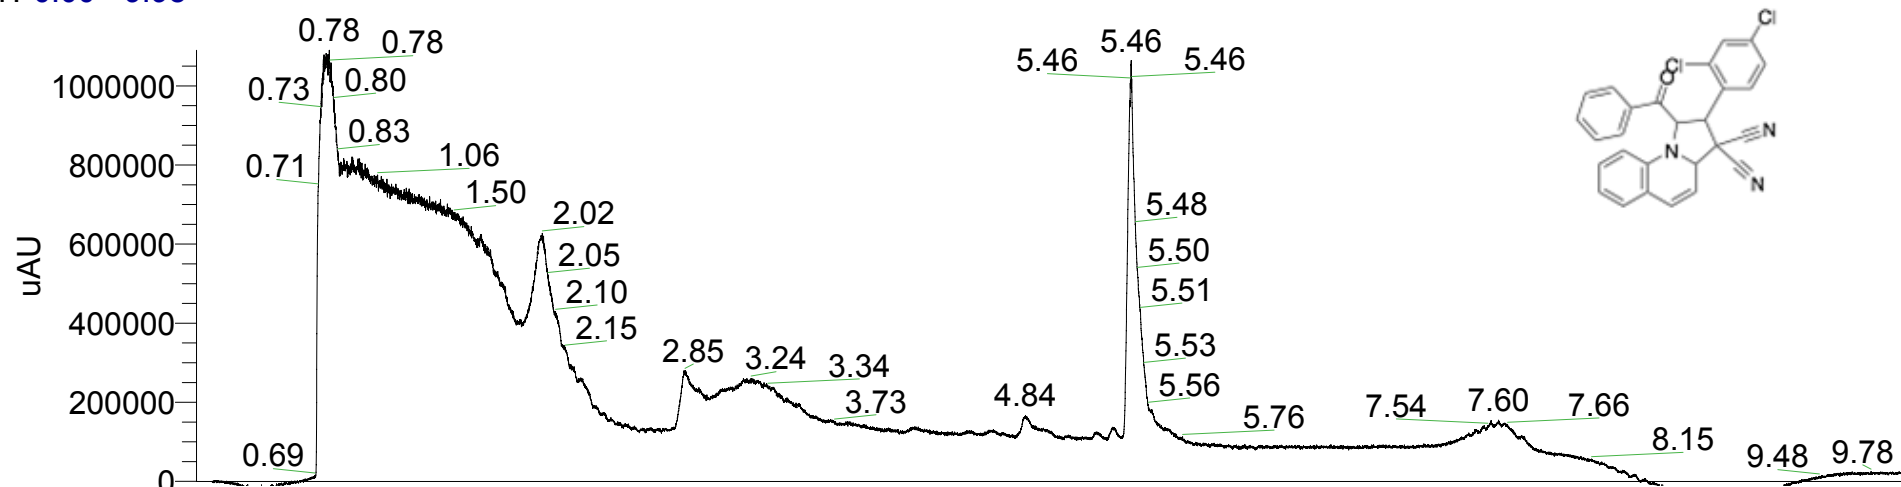

NL:  
1.09E6  
Channel A  
UV  
C1033229\_  
1

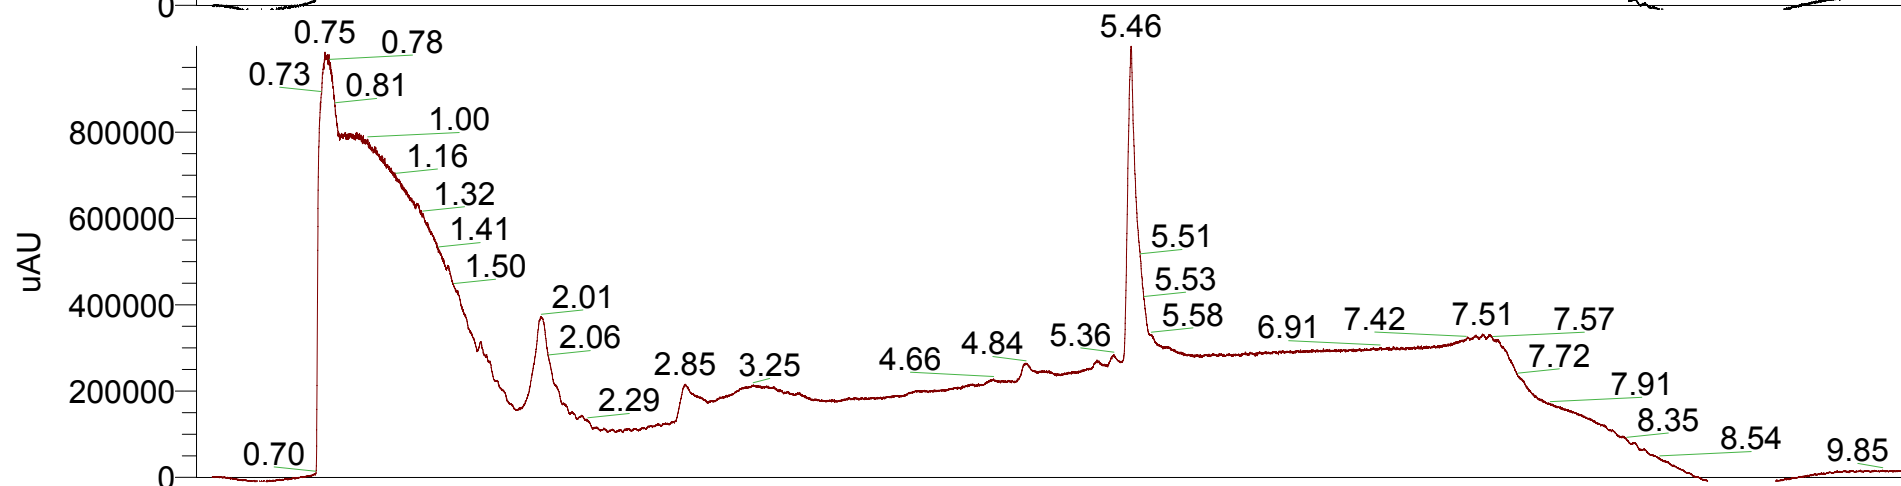

NL:  
9.99E5  
Channel B  
UV  
C1033229\_  
1

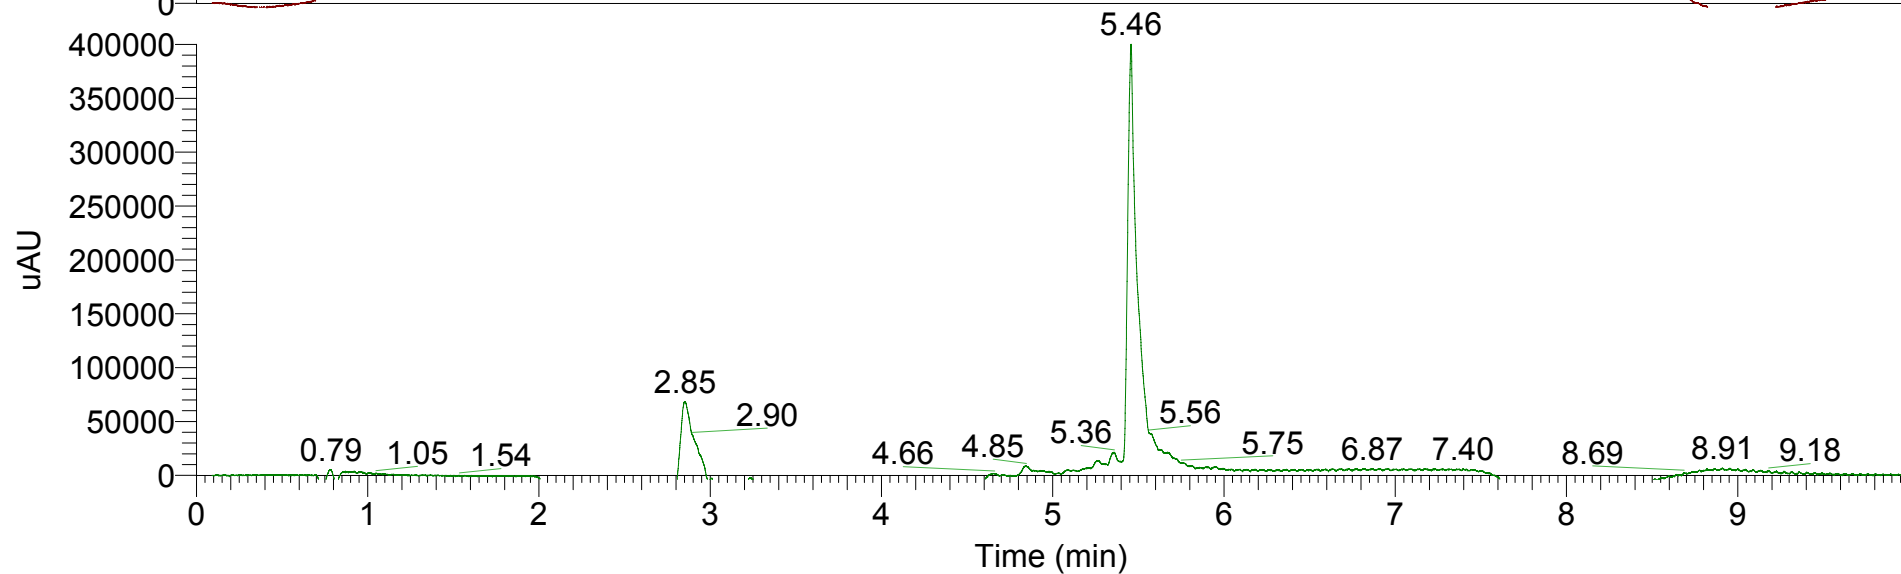

NL:  
4.00E5  
Channel C  
UV  
C1033229\_  
1



RT: 0.68 - 0.89

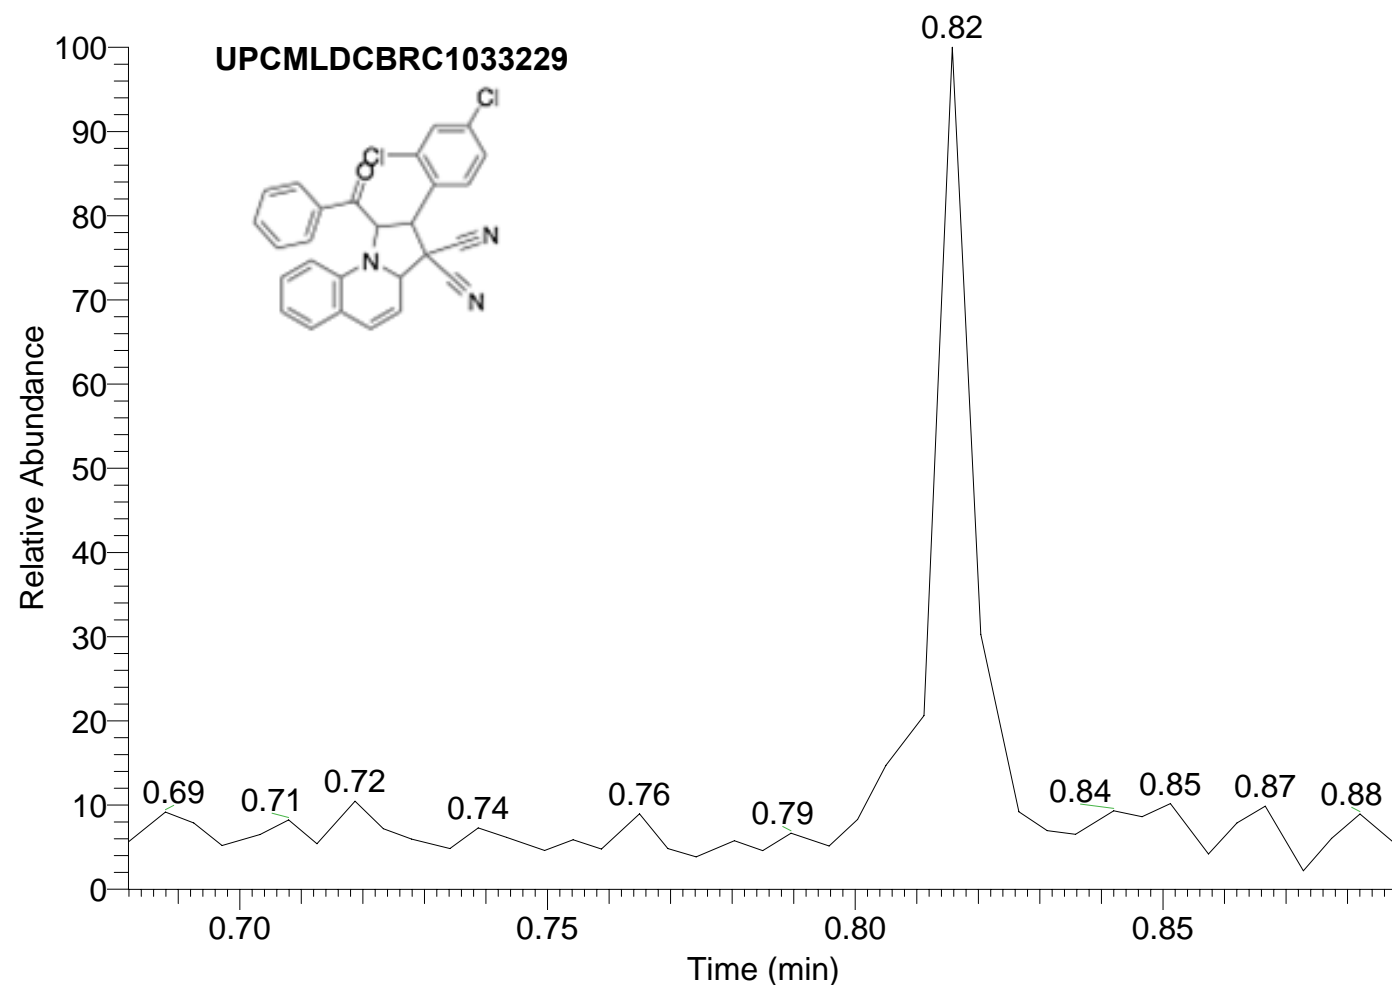

NL:  
4.36E7  
TIC F: FTMS -  
p ESI Full ms  
[150.00-  
2000.00] MS  
C1033229\_DI

C1033229\_DI #156-158 RT: 0.80-0.82 AV: 3 NL: 5.25E5  
T: FTMS - p ESI Full ms [150.00-2000.00]

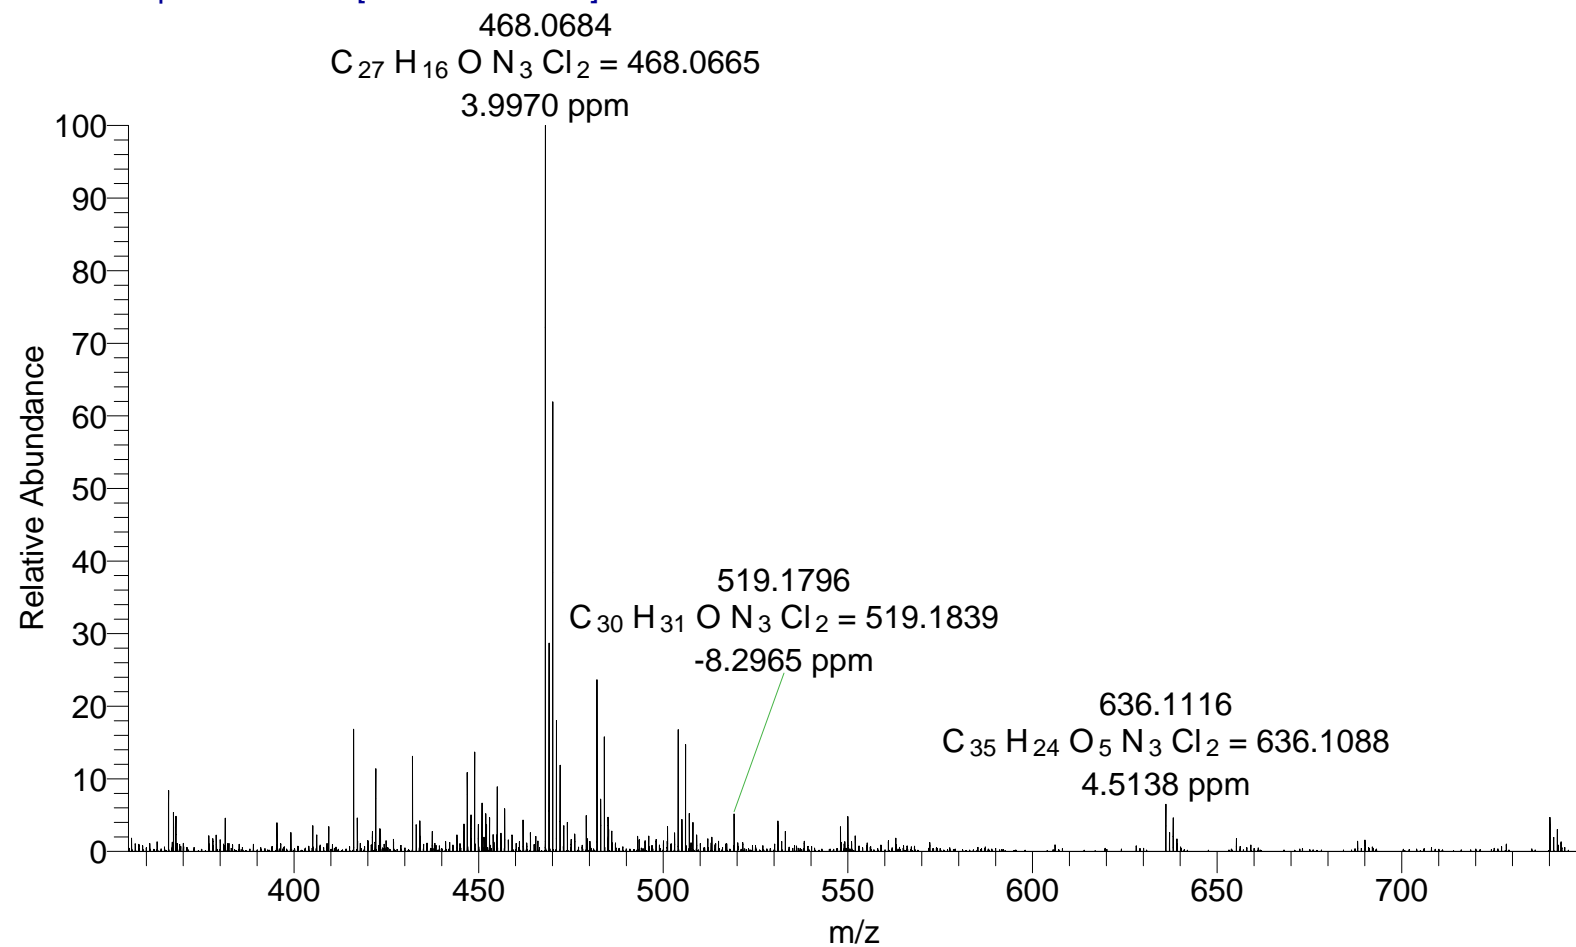

RT: 0.00 - 9.98

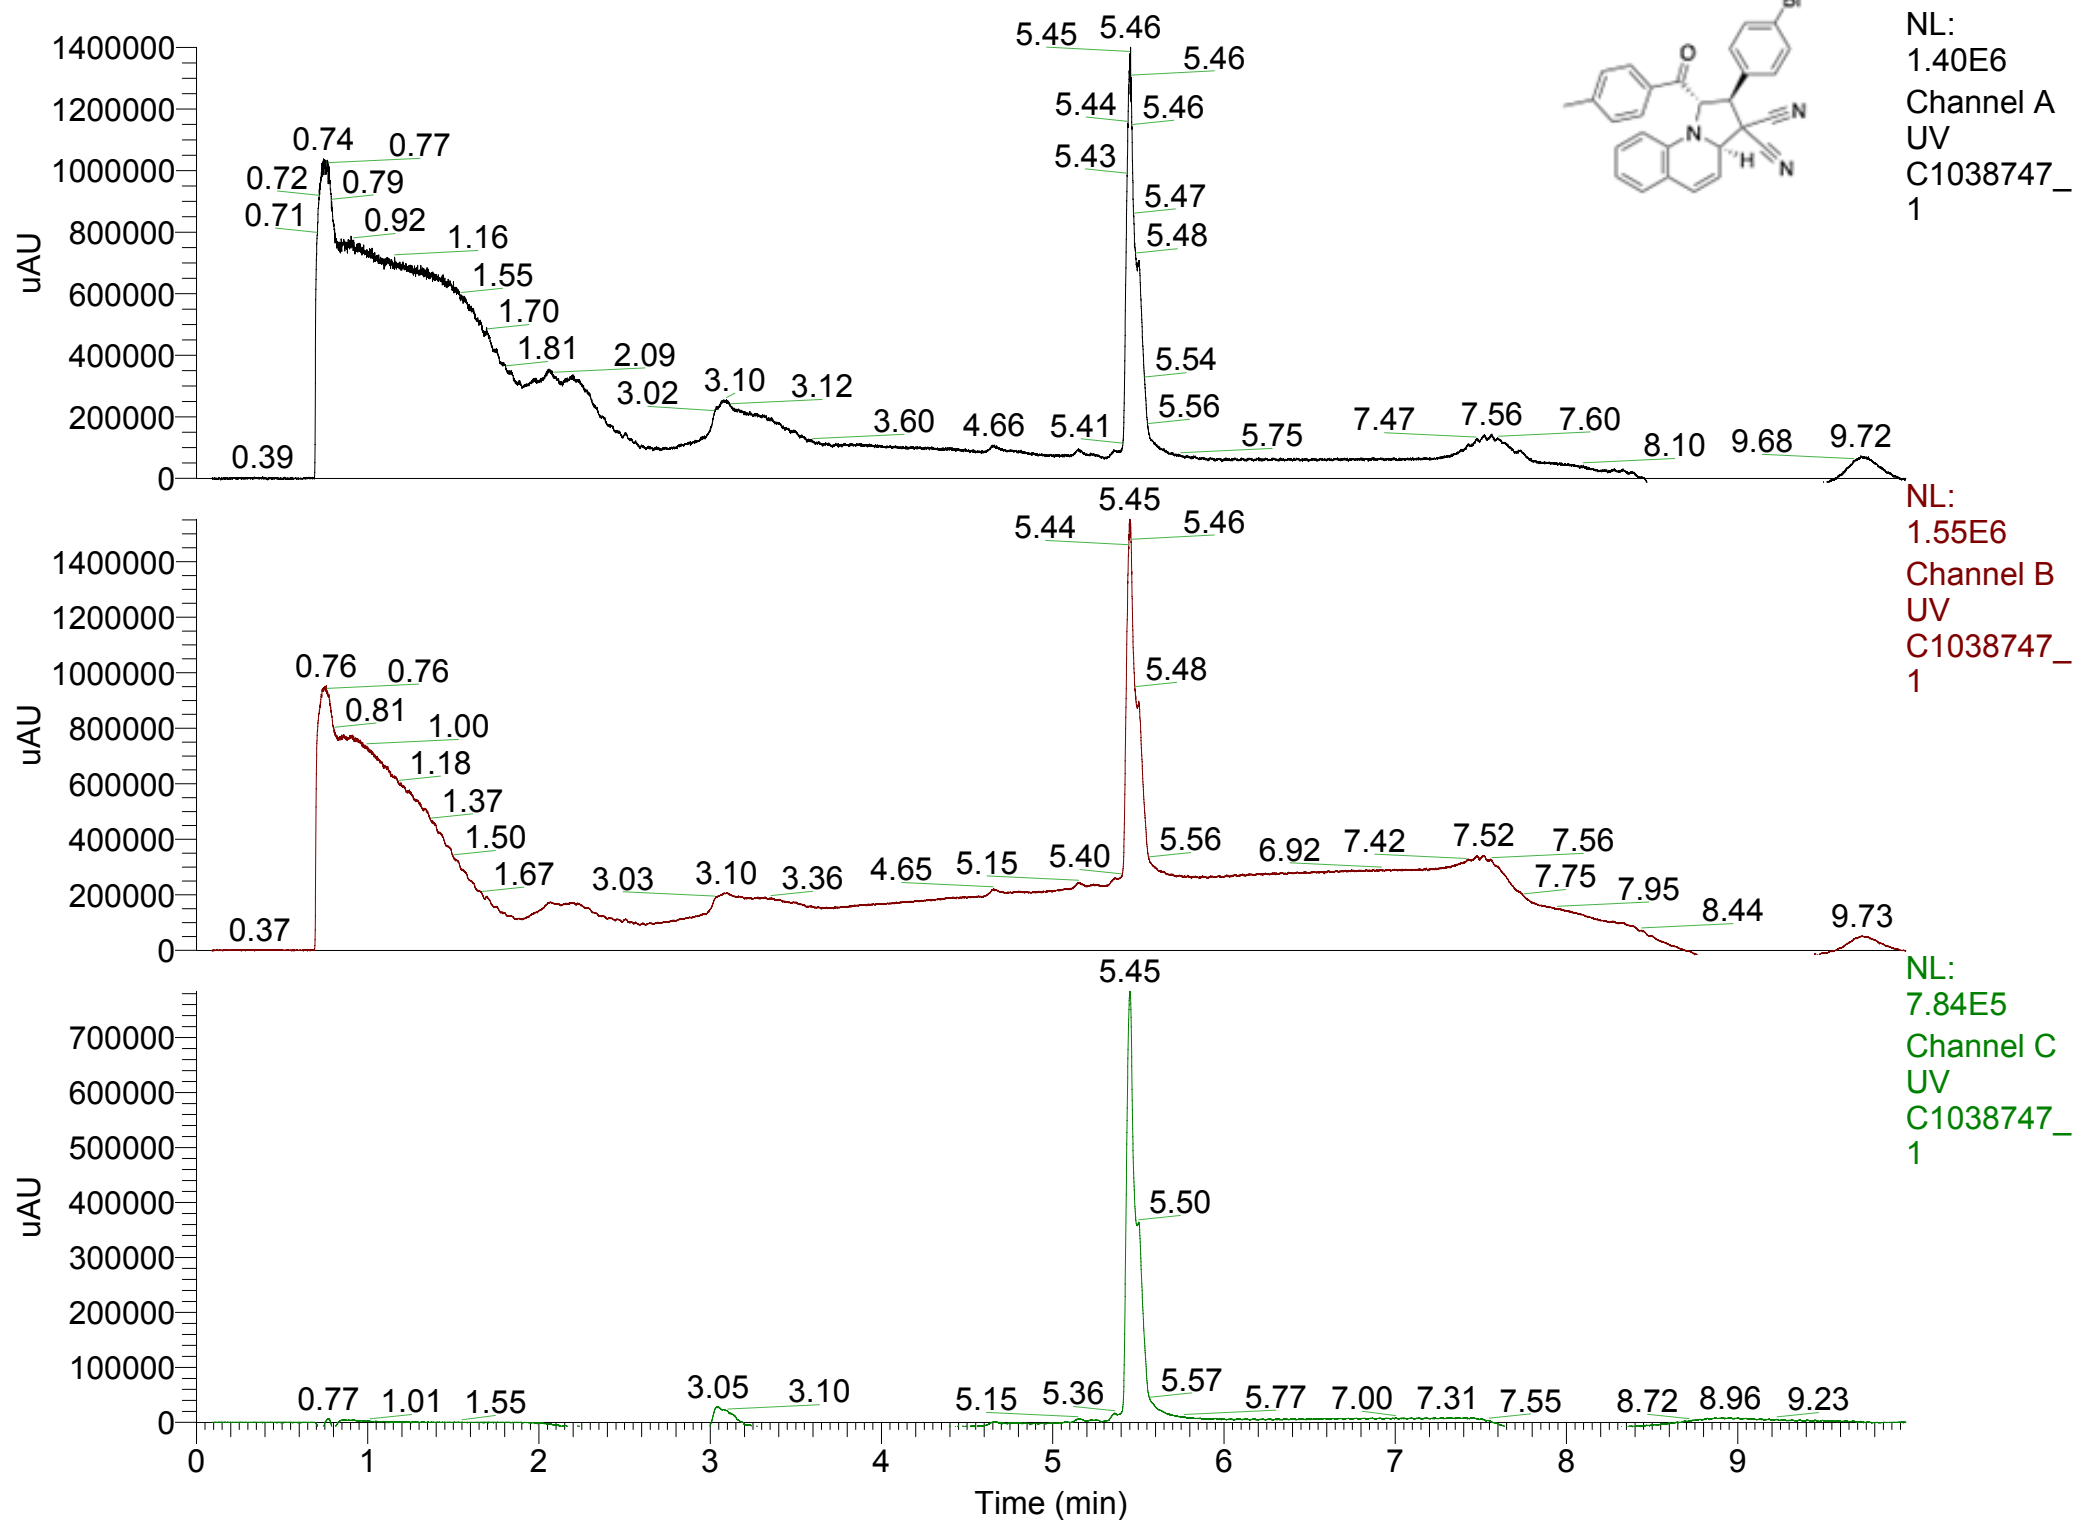

RT: 0.60 - 1.23

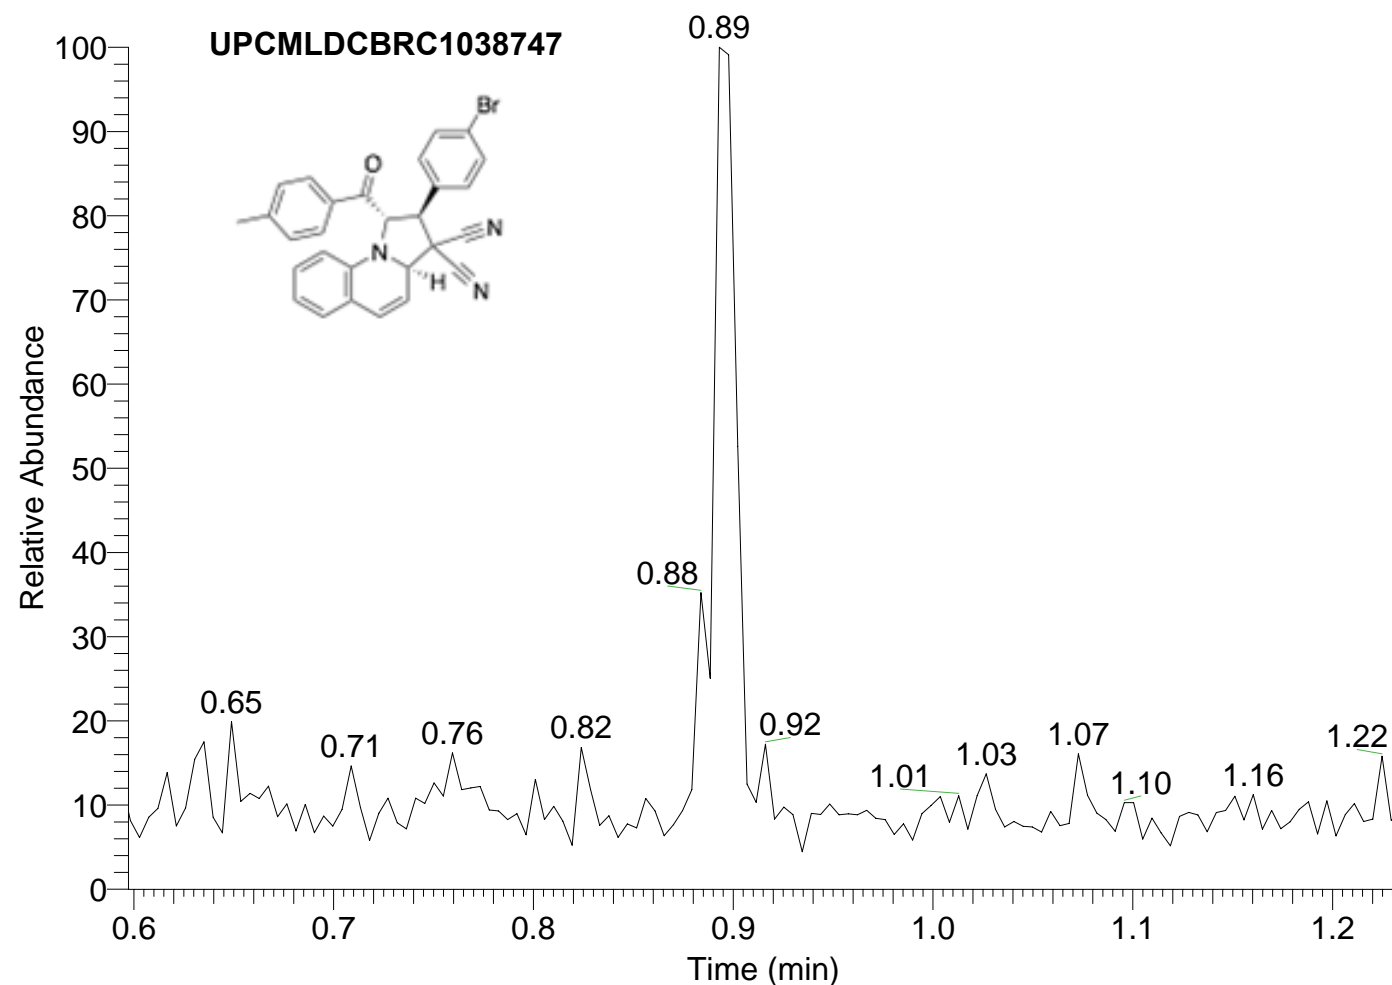

NL:  
2.17E7  
TIC F: FTMS -  
p ESI Full ms  
[150.00-  
2000.00] MS  
C1038747\_DI

C1038747\_DI #190-196 RT: 0.88-0.91 AV: 7 NL: 4.15E5  
T: FTMS - p ESI Full ms [150.00-2000.00]

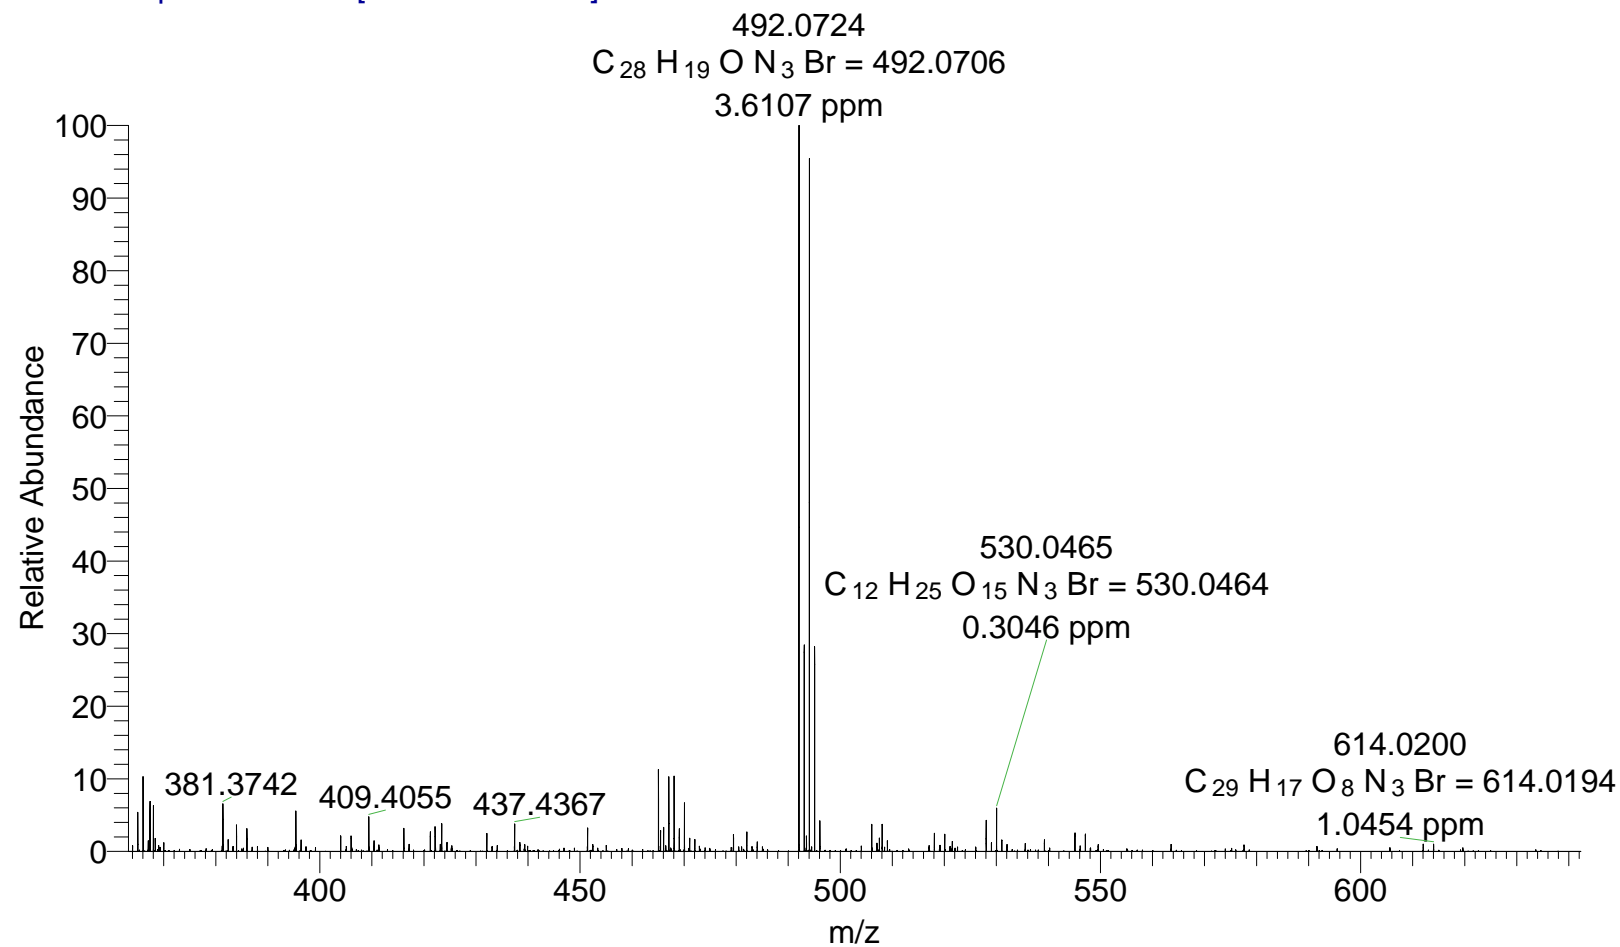

Supplement: s1 [file s1]
