# Supplementary material for: A High-Content Screen Reveals New Small-Molecule Enhancers of Ras/Mapk Signaling as Probes for Zebrafish Heart Development
Source: MDPI journal article supplement (doi:10.3390/molecules23071691), 2018-07-11
Supplement: s1 [file s1]

**A high-content screen reveals new small-molecule enhancers of Ras/Mapk signaling as probes for zebrafish heart development.**

Manush Saydmohammed<sup>1</sup>, Laura L. Vollmer<sup>2</sup>, Ezenwa O. Onuoha<sup>1</sup>, Taber S. Maskrey<sup>4</sup>, Gregory Gibson<sup>3</sup>, Simon C. Watkins<sup>3</sup>, Peter Wipf<sup>4</sup>, Andreas Vogt<sup>2, 5</sup>, Michael Tsang<sup>1</sup>

<sup>1</sup>Department of Developmental Biology, University of Pittsburgh, BST3, 3501 5<sup>th</sup> Avenue, Pittsburgh, PA 15213

<sup>2</sup>The University of Pittsburgh Drug Discovery Institute, 200 Lothrop Street, Pittsburgh, PA 15260

<sup>3</sup>Department of Cell Biology, University of Pittsburgh, 3500 Terrace Street, Pittsburgh, PA 15213

<sup>4</sup>Department of Chemistry, 219 University Drive, University of Pittsburgh, Pittsburgh, PA 15260

<sup>5</sup>Department of Computational and Systems Biology, University of Pittsburgh, Pittsburgh, PA 15213

Address correspondence to MT ([tsang@pitt.edu](mailto:tsang@pitt.edu)) or AV ([avogt@pitt.edu](mailto:avogt@pitt.edu)).

**Supplementary Figure Legends**

**Supplementary Figure S1: Three-point dose response pre-screen on 27 repurchased primary confirmed hits.**

**Supplementary Figure S2: Dose-response curves for compounds that were not selected for follow-up studies.**

**Supplementary Figure S3: SAR studies of ST006994 analogs from the UPCMLD library.**

**Supplementary Figure S4: Representative Chemical Complementation assay shows new compounds do not inhibit DUSP6.** Data are the averages  $\pm$  SEM. BCI, n=4; ST006994, n=3 (repurchased materials that confirmed in LC-MS). For ST006994 errors are smaller than the symbols. ST011282 n=1.
