# Supplementary material for: A High-Content Screen Reveals New Small-Molecule Enhancers of Ras/Mapk Signaling as Probes for Zebrafish Heart Development
Source: MDPI journal article supplement (doi:10.3390/molecules23071691), 2018-07-11
Supplement: s1 [file s1]

## **A high-content screen reveals new small-molecule enhancers of Ras/Mapk signaling as probes for zebrafish heart development.**

Manush Saydmohammed<sup>1</sup>, Laura L. Vollmer<sup>2</sup>, Ezenwa O. Onuoha<sup>1</sup>, Taber S. Maskrey<sup>4</sup>, Gregory Gibson<sup>3</sup>, Simon C. Watkins<sup>3</sup>, Peter Wipf<sup>4</sup>, Andreas Vogt<sup>2, 5</sup>, Michael Tsang<sup>1</sup>

<sup>1</sup>Department of Developmental Biology, University of Pittsburgh, BST3, 3501 5<sup>th</sup> Avenue, Pittsburgh, PA 15213

<sup>2</sup>The University of Pittsburgh Drug Discovery Institute, 200 Lothrop Street, Pittsburgh, PA 15260

<sup>3</sup>Department of Cell Biology, University of Pittsburgh, 3500 Terrace Street, Pittsburgh, PA 15213

<sup>4</sup>Department of Chemistry, 219 University Drive, University of Pittsburgh, Pittsburgh, PA 15260

<sup>5</sup>Department of Computational and Systems Biology, University of Pittsburgh, Pittsburgh, PA 15213

Address correspondence to MT ([tsang@pitt.edu](mailto:tsang@pitt.edu)) or AV ([avogt@pitt.edu](mailto:avogt@pitt.edu)).

### **Supplementary Data Legends:**

**Supplementary Data 1: PAINS analysis of primary confirmed hits.** Fifty visually confirmed primary screen hits were analyzed for predicted pan assay interference compounds (PAINS) by publicly available analysis engines (ZINC15, [www.zinc15.docking.org](http://www.zinc15.docking.org)); FAFDrugs4 (Free ADME-Tox Filtering Tool, <http://fafdrugs3.mti.univ-paris-diderot.fr/>); False Positive Remover ([www.cbligand.org](http://www.cbligand.org)); accessed May 2018). Compounds were grouped by structural similarity. The last

column (cluster coverage) denotes the number of commercially available compounds that were repurchased from each cluster.

#### **Supplementary Data 2. Promiscuity analysis of primary confirmed hits.**

Fifty visually confirmed primary screen hits were analyzed for predicted promiscuity using the Bioactivity data associative promiscuity pattern learning engine (Badapple); <http://pasilla.health.unm.edu/tomcat/badapple/badapple>; accessed June 2018). The scoring scheme is as follows: green, pScore 0-100, no indication of promiscuity; yellow, 100-300; weak indication of promiscuity; red, >300, strong indication of promiscuity; no color, unknown; no data. For each molecule, the highest scoring scaffold determines overall score.

**Table headings** are: mon\_smi, compound structures; scaf\_smi, scaffold structures; pScore, Badapple assigned promiscuity estimate (see scoring scheme above); Substances Tested, number of compounds containing scaffold substructure; Samples Tested, number of times substructure was tested; Assays Active, number of assays in which substructure was active; Assays Tested, number of assays substructure was tested; Percent Assays Active, calculated ratio of Assays Active/Assays Tested \*100.

#### **Supplementary Data 3. LC-HRMS data for ST020101, ST011282, and ST00694.**

**Supplementary Data 4. Structure/identity confirmation and LC-HRMS of ST006994 analogs from the UPCMLD library.** For technical details please refer to the Materials and Methods Section.
