# Supplementary material for: A High-Content Screen Reveals New Small-Molecule Enhancers of Ras/Mapk Signaling as Probes for Zebrafish Heart Development
Source: MDPI journal article supplement (doi:10.3390/molecules23071691), 2018-07-11
Supplement: s1 [file s1]

RT: 0.00 - 9.98

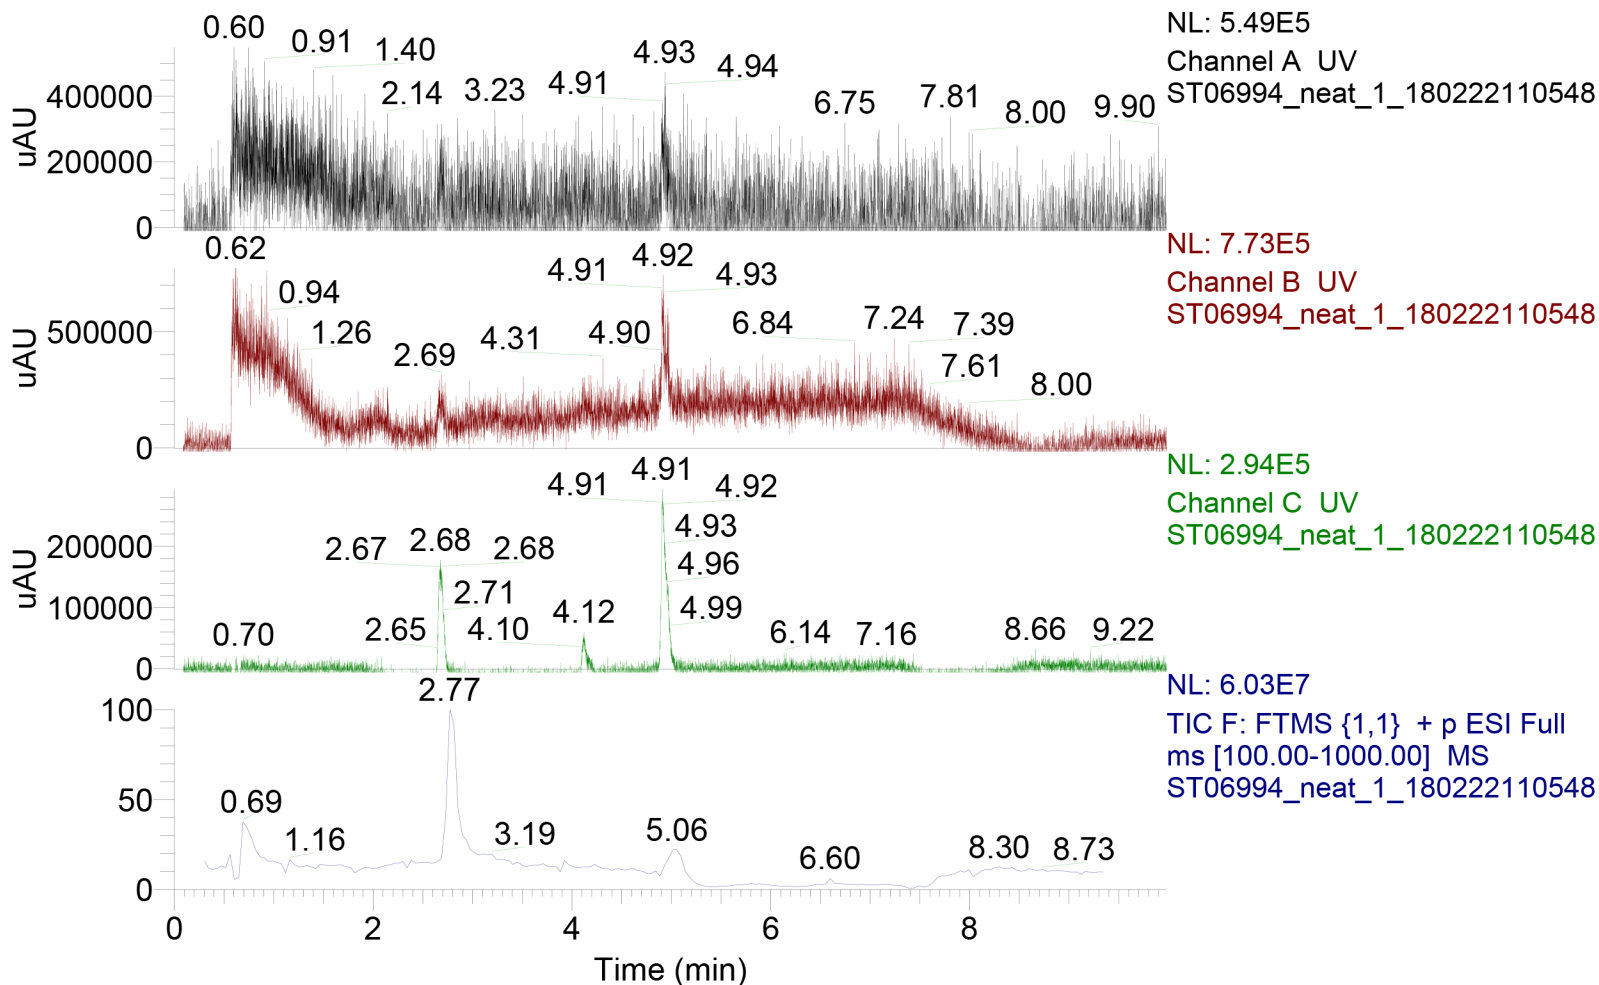

ST06994\_neat\_1\_180222110548 #217-221 RT: 4.97-5.06 AV: 3 NL: 2.84E6  
T: FTMS {1,1} + p ESI Full lock ms [100.00-1000.00]

432.1703  
 $C_{28}H_{22}O_2N_3 = 432.1707$   
-0.9133 ppm

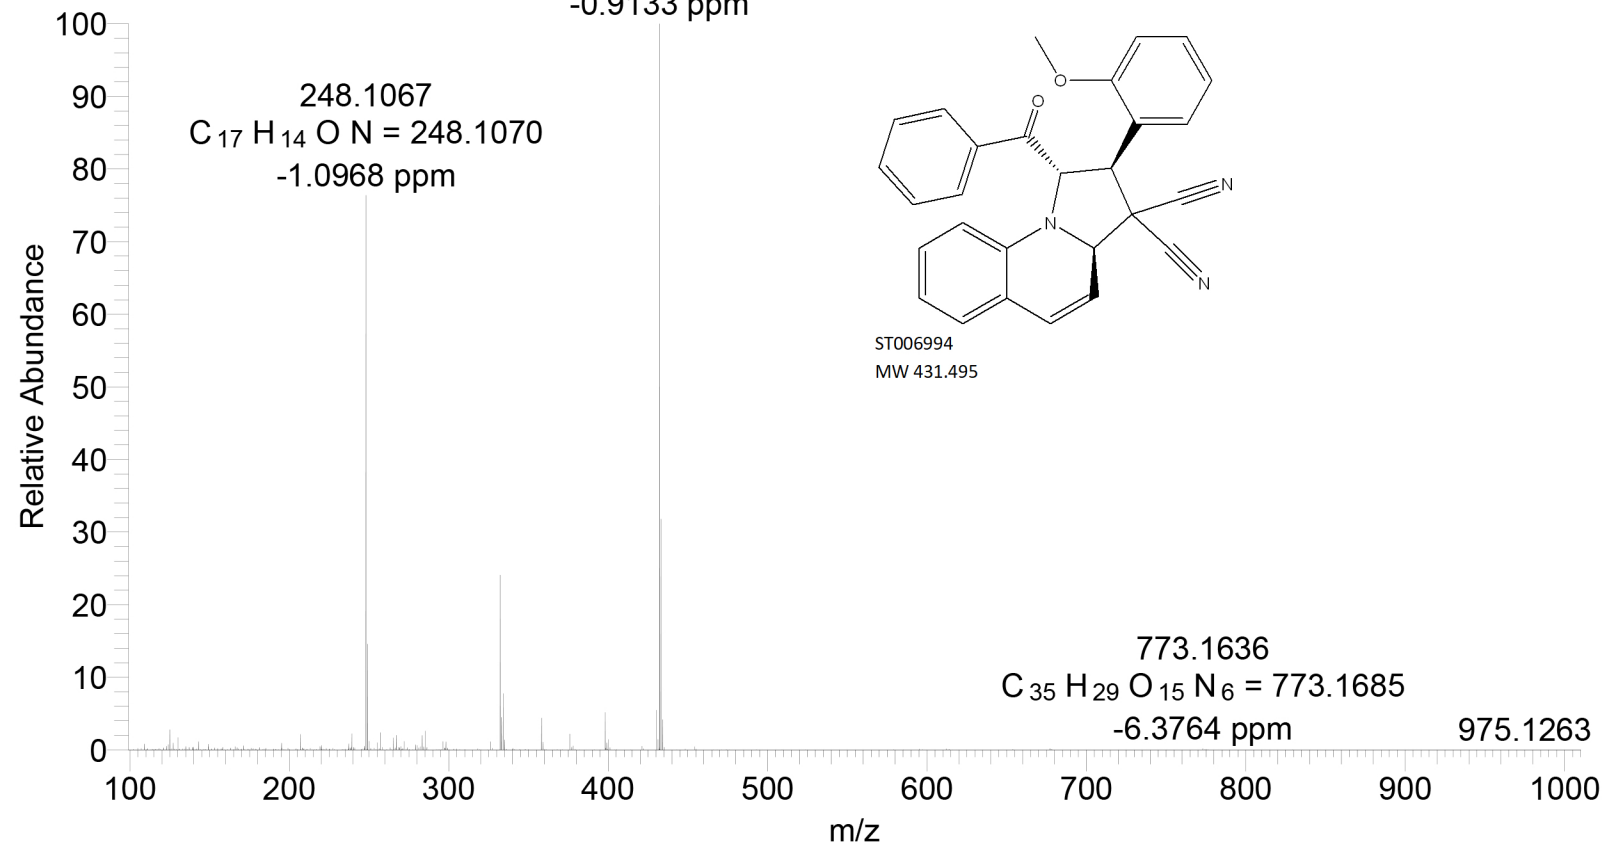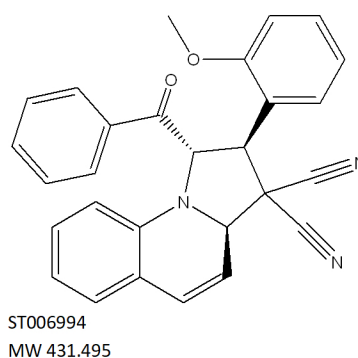

RT: 0.00 - 9.98

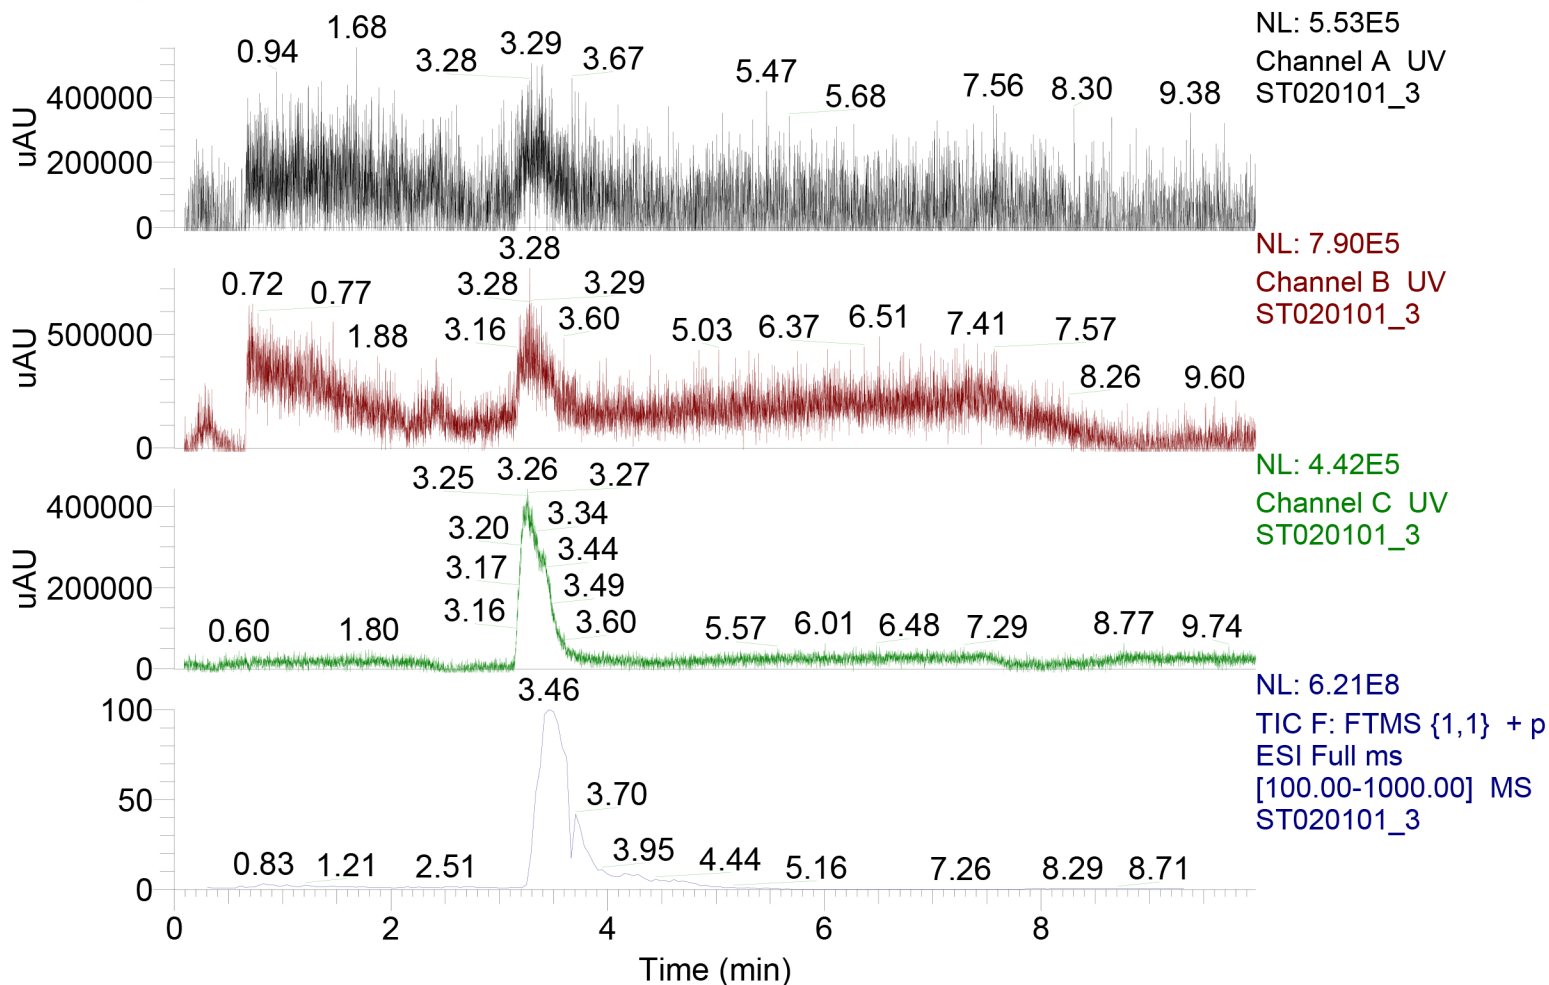

ST020101\_3 #142-153 RT: 3.38-3.58 AV: 6 NL: 3.13E8  
T: FTMS {1,1} + p ESI Full ms [100.00-1000.00]

332.2004

C<sub>23</sub>H<sub>26</sub>O<sub>2</sub>N = 332.2009

-1.3980 ppm

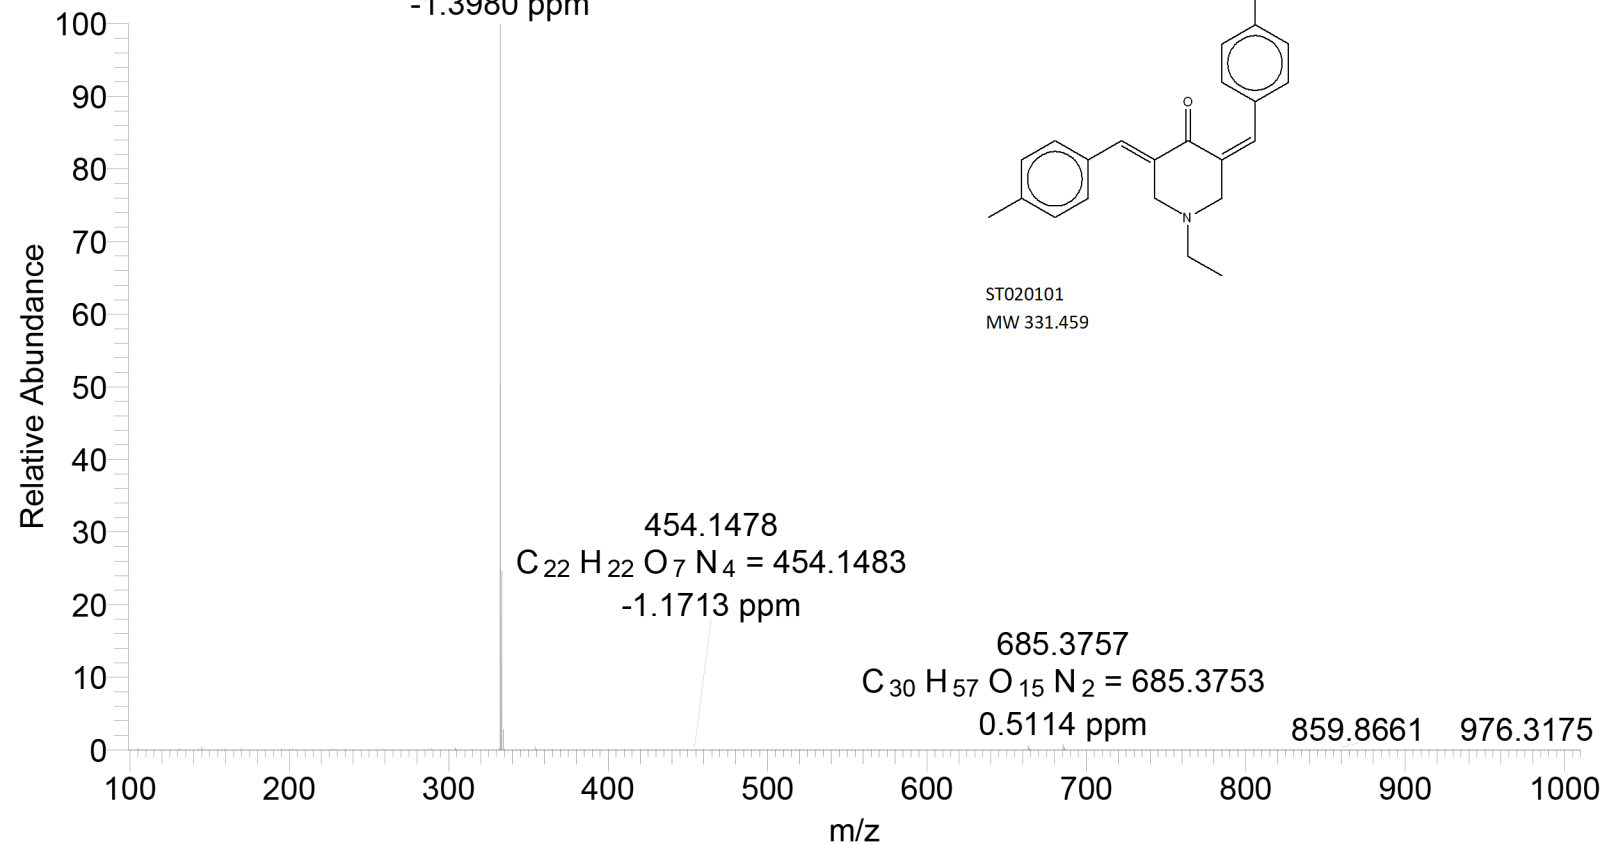

RT: 0.00 - 9.98

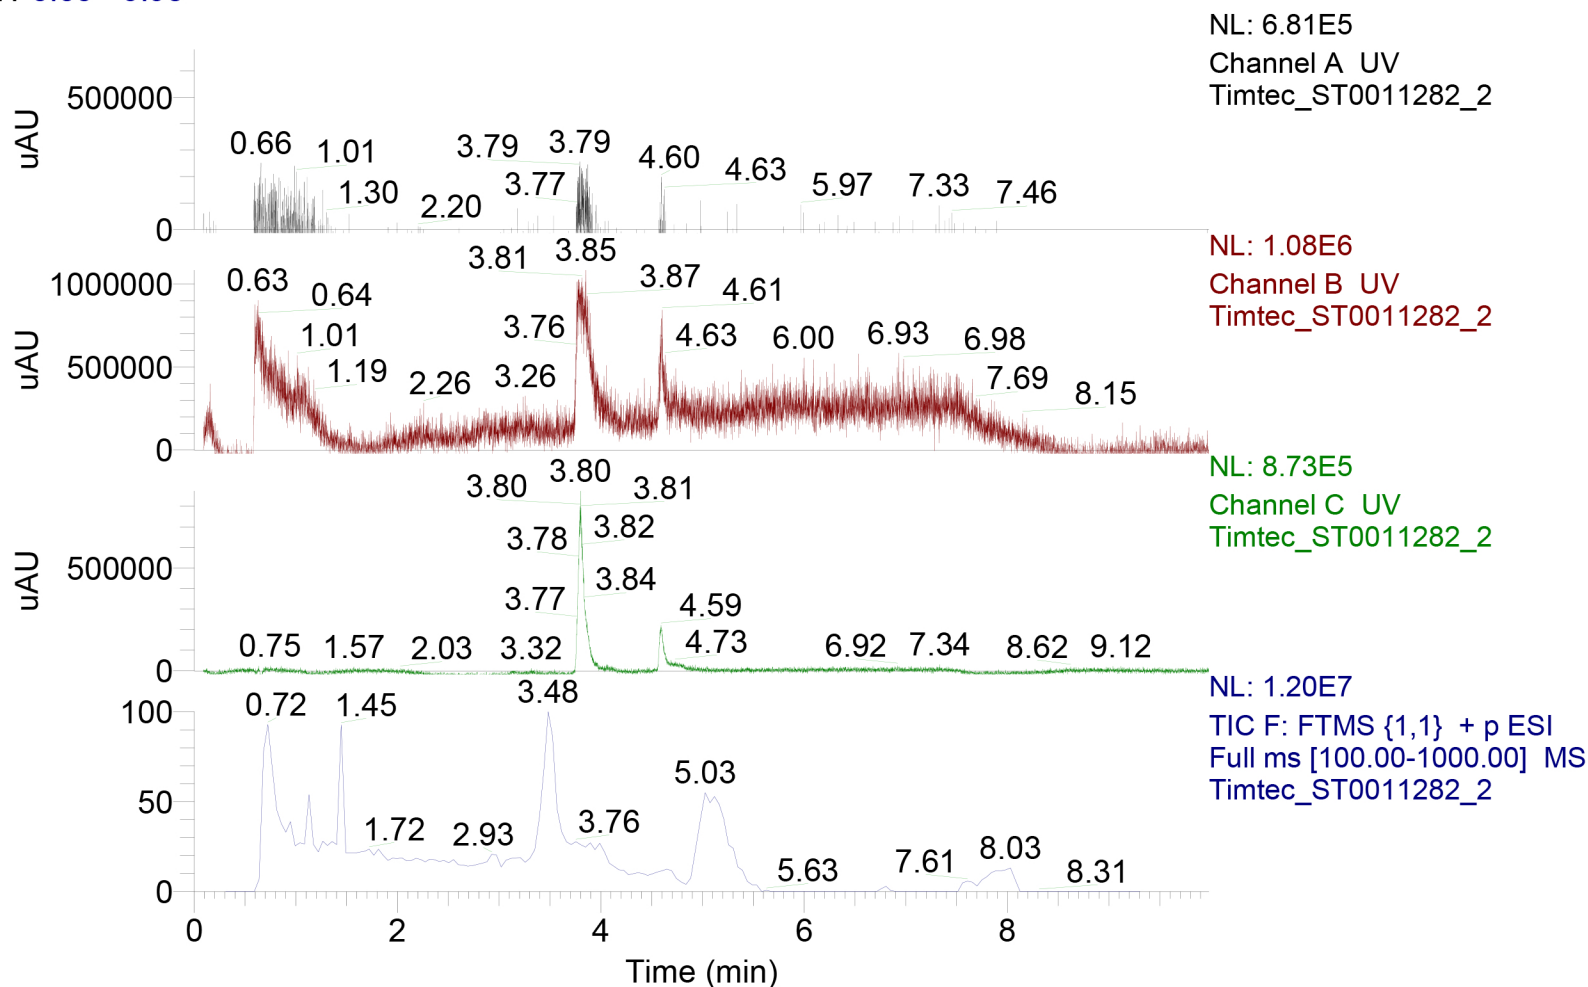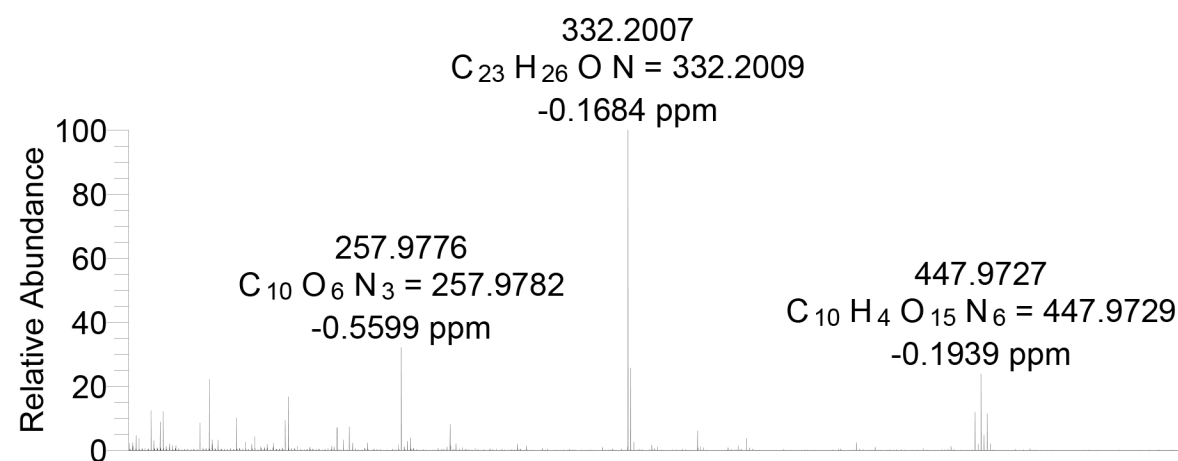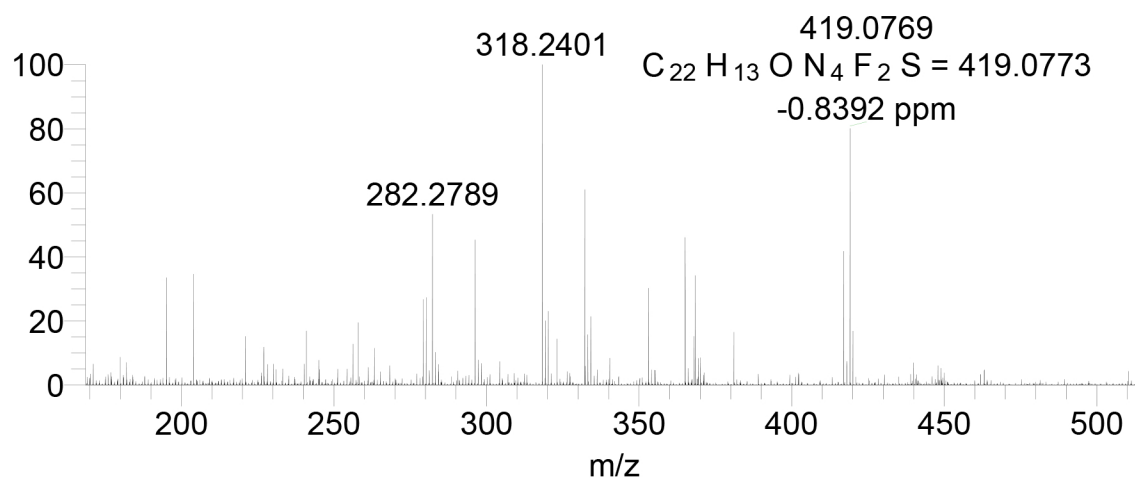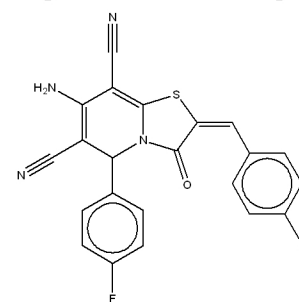

ST011282  
MW 418.43
